# Supplementary material for: Gas phase complexes of H3N⋯CuF and H3N⋯CuI studied by rotational spectroscopy and ab initio calculations: the effect of X (X = F, Cl, Br, I) in OC⋯CuX and H3N⋯CuX
Source: Royal Society of Chemistry journal article supplement (doi:10.1039/c6cp01368f), 2016-01-01
Supplement: c6cp01368f1.log [file c6cp01368f1.log]

Pgopher 8.0.169 24 Jan 2014 9:23 32 bit (Delphi 18.5/18)
Mixture: D3N63CuF.pgo
  Units               MHz
  PrintLevel          Detail
  Precision           4
  BasisOrder          boDefault
  QuantumNumberFormat J
  FitCycles           1
  FitDetails          False
  AutoReplot          True
  AllowComplex        False
  NoLineList          False
  ShowEstUnc          False
  ShowDerivatives     False
  SVDlimit            5
  SVDThresh    1E-15
  ScaleChanges 1
  Species: Species
    Jmax 60
    Concentration 1
    SymmetricMolecule: D3N63CuF
      nNuclei        2
      JAdjustSym     False
      BlockMatrix    True
      PointGroup     C3v
      AlternateBasis False
      wt(A1,A2)      1
      wt(E)          1
      (Wt2)          1
      (Wt3)          1
      (Wt4)          1
      (Wt5)          1
      (Wt6)          1
      (Wt7)          1
      (Wt8)          1
      (Wt9)          1
      (Wt10)         1
      (Wt11)         1
      (Wt12)         1
      (Wt13)         1
      Abundance 1
      SymmetricManifold: Ground
        Initial       True
        EigenSearch   True
        LimitSearch   False
        AutoQConverge True
        UsePopParams  False
        SymmetricTop: v=0
          Symmetry A1
          Kmin     0
          Kmax     1
          B  3570.38738877959           Float
          C  189091.497
          DJ 0.0012
          symmetricTopNucleus: N
            Spin   1
            AsNext False
            eQq -2.77609758247377          Float
          symmetricTopNucleus: Cu
            Spin   1.5
            AsNext False
            eQq   66.4409556319068           Float
            Cperp 0.0216854465579571         Float
        <N  ,K  ,l  |B|N,K,l> = N*(N+1)-K^2
        <N  ,K  ,l  |C|N,K,l> = K^2
        <N  ,K  ,l  |DJ|N,K,l> = -N^2*(N+1)^2
      TransitionMoments: <Ground|mu|Ground>
        CartesianTransitionMoment: <v=0|a|v=0>
          Axis a
          Strength 0.66
        Symbolic Matrix Elements not available for <v=0|a|v=0>


Residuals before fit for D3N63CuF for the Ground manifold
    J'S'  #'    J"S"  #"     Observed    Calculated      Obs-Calc StdDev 
  2.5 A1  4   1.5 A2  3    14279.4200    14279.4184        0.0016 1       .00097      0 : qR0(1)2,2.5,2,1.5 : v=0  2  0 A1  2 2.5 - v=0  1  0 A2  2 1.5 : 1-d-SF6-2-d-ND3-6bar-Ar-Cu-FT-2520k_high_res.txt - Overlays :   1:<LineList>
  3.5 A1  1   2.5 A2  1    14280.0210    14280.0030        0.0180 1       .00201      0 : qR0(1)2,3.5,1,2.5 : v=0  2  0 A1  2 3.5 - v=0  1  0 A2  1 2.5 : 1-d-SF6-2-d-ND3-6bar-Ar-Cu-FT-2520k_high_res.txt - Overlays :   2:<LineList>
  2.5 A1  2   1.5 A2  2    14280.1000    14280.1212       -0.0212 1       .00147      0 : qR0(1)1,2.5,0,1.5 : v=0  2  0 A1  1 2.5 - v=0  1  0 A2  0 1.5 : 1-d-SF6-2-d-ND3-6bar-Ar-Cu-FT-2520k_high_res.txt - Overlays :   3:<LineList>
  4.5 A1  1   3.5 A2  1    14280.1890    14280.1818        0.0072 1       .00276      0 : qR0(1)3,4.5,2,3.5 : v=0  2  0 A1  3 4.5 - v=0  1  0 A2  2 3.5 : 1-d-SF6-2-d-ND3-6bar-Ar-Cu-FT-2520k_high_res.txt - Overlays :   4:<LineList>
  3.5 A1  2   2.5 A2  2    14280.2650    14280.2772       -0.0122 1       .00156      0 : qR0(1)3,3.5,2,2.5 : v=0  2  0 A1  3 3.5 - v=0  1  0 A2  2 2.5 : 1-d-SF6-2-d-ND3-6bar-Ar-Cu-FT-2520k_high_res.txt - Overlays :   5:<LineList>
  1.5 A1  4   0.5 A2  2    14280.8830    14280.8781        0.0049 1       .00055      0 : qR0(1)1,1.5,1,0.5 : v=0  2  0 A1  1 1.5 - v=0  1  0 A2  1 0.5 : 1-d-SF6-2-d-ND3-6bar-Ar-Cu-FT-2520k_high_res.txt - Overlays :   6:<LineList>
  1.5 A1  2   1.5 A2  1    14281.5000    14281.4983        0.0017 1       .00052      0 : qR0(1)3,1.5,1,1.5 : v=0  2  0 A1  3 1.5 - v=0  1  0 A2  1 1.5 : 1-d-SF6-2-d-ND3-6bar-Ar-Cu-FT-2520k_high_res.txt - Overlays :   7:<LineList>
  0.5 A1  3   1.5 A2  1    14298.1890    14298.1891       -0.0001 1       3.1e-5      0 : qR0(1)1,0.5,1,1.5 : v=0  2  0 A1  1 0.5 - v=0  1  0 A2  1 1.5 : 1-d-SF6-2-d-ND3-6bar-Ar-Cu-FT-2520k_high_res.txt - Overlays :   8:<LineList>

8 Observations,  4 Parameters
Initial Average Error: 0.0158434723203836
Predicted New Error:   0.0158434723203808
Parameters:
  # Old                 New                 Std Dev   Change/Std Sens    Summary              Name
  1 3570.38738877959    3570.38738878043    .00158709    0.0000  9.9e-5  3570.3874(16)        v=0 B
  2 -2.77609758247377   -2.77609756785226   .04083746    0.0000  .002847 -2.776(41)           N eQq
  3 66.4409556319068    66.4409556029665    .06828572    0.0000  .004397 66.441(68)           Cu eQq
  4 .0216854465579571   .0216854403875539   .00536282    0.0000  .000327 0.0217(54)           Cu Cperp

Correlation Matrix
       1       2       3       4
  1   1.000
  2   0.132   1.000
  3  -0.295   0.046   1.000
  4  -0.435  -0.077   0.376   1.000
