# Supplementary material for: Gas phase complexes of H3N⋯CuF and H3N⋯CuI studied by rotational spectroscopy and ab initio calculations: the effect of X (X = F, Cl, Br, I) in OC⋯CuX and H3N⋯CuX
Source: Royal Society of Chemistry journal article supplement (doi:10.1039/c6cp01368f), 2016-01-01
Supplement: c6cp01368f2.log [file c6cp01368f2.log]

Pgopher 9.0.171 14 Dec 2015 22:26 32 bit (Delphi 18.5/18)
Mixture: D3N63CuI.pgo
  Units               MHz
  PrintLevel          Detail
  Precision           4
  BasisOrder          boDefault
  QuantumNumberFormat J
  FitCycles           1
  FitDetails          False
  AutoReplot          True
  AllowComplex        False
  NoLineList          False
  ShowEstUnc          False
  ShowDerivatives     False
  SVDlimit            5
  ShowSubBasis        False
  AllowZeroI          False
  ScaledParameters    True
  SVDThresh    1E-6
  ScaleChanges 1
  SmallE       5.99584916E-14
  Species: Species
    Jmin 0
    Jmax 60
    Concentration 1
    SymmetricMolecule: D3N63CuI
      nNuclei        3
      Jmax           30
      Colour         Red
      JAdjustSym     False
      BlockMatrix    True
      PointGroup     C3v
      AlternateBasis False
      SymmetryLabels Required
      CompactKLabels False
      wt(A1,A2)      1
      wt(E)          1
      (Wt2)          1
      (Wt3)          1
      (Wt4)          1
      (Wt5)          1
      (Wt6)          1
      (Wt7)          1
      (Wt8)          1
      (Wt9)          1
      (Wt10)         1
      (Wt11)         1
      (Wt12)         1
      (Wt13)         1
      Abundance     1
      AssumedOrigin 1E99
      SymmetricManifold: Ground
        Jmin          0
        Jmax          30
        Initial       True
        EigenSearch   True
        LimitSearch   False
        AutoQConverge True
        UsePopParams  False
        SymmetricTop: v=0
          Symmetry A1
          Kmin     0
          Kmax     1
          B   1064.91347937384           Float
          C   95751
          DJ  9.0703654146297E-5         Float
          DJK 0.00966031822282912        Float
          <N  ,K  ,l  |B|N,K,l> = N*(N+1)-K^2

          <N  ,K  ,l  |C|N,K,l> = K^2

          <N  ,K  ,l  |DJ|N,K,l> = -N^2*(N+1)^2

          <N  ,K  ,l  |DJK|N,K,l> = -N*(N+1)*K^2

          symmetricTopNucleus: N
            Spin   1
            AsNext False
            MaxDJ  -0.5
            eQq -2.58983335692657          Float
            Matrix elements for eQq not available
          symmetricTopNucleus: Cu
            Spin   1.5
            AsNext False
            MaxDJ  -0.5
            eQq 63.7458594721664           Float
            Matrix elements for eQq not available
          symmetricTopNucleus: I
            Spin   2.5
            AsNext False
            MaxDJ  -0.5
            eQq -612.863497108735          Float
            Matrix elements for eQq not available
      TransitionMoments: <Ground|mu|Ground>
        CartesianTransitionMoment: <v=0|a|v=0>
          Axis a
          Strength 0.66
        Symbolic Matrix Elements not available for <v=0|a|v=0>
  Simulation: Simulation
    Intensity factor:0.333333333333333 (1 from Spol)
    IntensityUnits Normalized
    LifeModel      lmNone
    PlotUnits      MHz
    nDF            2000
    WidthMult      6
    AutoMin        True
    AutoMax        True
    ShowSum        False
    ShowParts      True
    ShowFortrat    False
    UseUpper       False
    ShowSymmetry   True
    ShowDeltaJ     False
    ScaleMarkSize  True
    UseSymmetry    False
    UseStateNumber False
    FortratQno     J
    Fmin        8519.76000713015
    Fmax        8532.89569099485
    Ymax        2.58588798339874E-5
    Temperature 20
    Gaussian    0.03
    SMargin     -1
    OThreshold  1E-6
    Tvib        -1
    Tspin       -1
    PlotSplit   0.5
  Fundamental Constants from CODATA 2014: h=6.62607004E-34 k=1.38064852E-23 NA=6.022140857E23 e=1.6021766208E-19 me=9.10938356E-31


Residuals before fit for D3N63CuI for the Ground manifold
    F'S'   #'    F"S"   #"     Observed    Calculated      Obs-Calc StdDev 
    9 A1   1     8 A2   1     8523.5790     8523.5697        0.0093 1.00000 2.1e-7 0.0000 : qR0(3)5,6.5,9,4,5.5,8 : v=0  4  0 A1  5 6.5  9 - v=0  3  0 A2  4 5.5  8 : 06-050315-1-div-CF3I-2-div-ND3-Cu-6-bar-Ar-1080k-FT-high_res - Overlays   :   2:<LineList>
    7 A1   5     6 A2   5     8523.5790     8523.5632        0.0158 1.00000 1.6e-7 0.0000 : qR0(3)3,4.5,7,2,3.5,6 : v=0  4  0 A1  3 4.5  7 - v=0  3  0 A2  2 3.5  6 : 06-050315-1-div-CF3I-2-div-ND3-Cu-6-bar-Ar-1080k-FT-high_res - Overlays   :   3:<LineList>
    8 A1   3     7 A2   3     8524.2650     8524.2608        0.0042 1.00000 1.8e-7 0.0000 : qR0(3)5,5.5,8,4,4.5,7 : v=0  4  0 A1  5 5.5  8 - v=0  3  0 A2  4 4.5  7 : 06-050315-1-div-CF3I-2-div-ND3-Cu-6-bar-Ar-1080k-FT-high_res - Overlays   :   4:<LineList>
    6 A1  12     5 A2  12     8524.2650     8524.2546        0.0104 1.00000 1.3e-7 0.0000 : qR0(3)3,3.5,6,2,2.5,5 : v=0  4  0 A1  3 3.5  6 - v=0  3  0 A2  2 2.5  5 : 06-050315-1-div-CF3I-2-div-ND3-Cu-6-bar-Ar-1080k-FT-high_res - Overlays   :   5:<LineList>
    7 A1   6     6 A2   6     8524.5970     8524.6175       -0.0205 1.00000 1.5e-7 0.0000 : qR0(3)5,4.5,7,4,3.5,6 : v=0  4  0 A1  5 4.5  7 - v=0  3  0 A2  4 3.5  6 : 06-050315-1-div-CF3I-2-div-ND3-Cu-6-bar-Ar-1080k-FT-high_res - Overlays   :   6:<LineList>
    5 A1  18     4 A2  16     8524.5970     8524.6071       -0.0101 1.00000 1.1e-7 0.0000 : qR0(3)3,2.5,5,3,3.5,4 : v=0  4  0 A1  3 2.5  5 - v=0  3  0 A2  3 3.5  4 : 06-050315-1-div-CF3I-2-div-ND3-Cu-6-bar-Ar-1080k-FT-high_res - Overlays   :   7:<LineList>
    5 A2  22     4 A1  22    10638.3100    10638.3141       -0.0041 1.00000 1.1e-7 0.0000 : qR0(4)6,6.5,5,3,2.5,4 : v=0  5  0 A2  6 6.5  5 - v=0  4  0 A1  3 2.5  4 : 06-050315-1-div-CF3I-2-div-ND3-Cu-6-bar-Ar-1080k-FT-high_res - Overlays   :   8:<LineList>
    3 A2  26     2 A1  20    10638.3100    10638.3395       -0.0295 1.00000 6.3e-8 0.0000 : qR0(4)4,4.5,3,3,4.5,2 : v=0  5  0 A2  4 4.5  3 - v=0  4  0 A1  3 4.5  2 : 06-050315-1-div-CF3I-2-div-ND3-Cu-6-bar-Ar-1080k-FT-high_res - Overlays   :   9:<LineList>
    5 A2  24     4 A1  23    10640.2620    10640.2292        0.0328 1.00000 1.2e-7 0.0000 : qR0(4)6,7.5,5,5,6.5,4 : v=0  5  0 A2  6 7.5  5 - v=0  4  0 A1  5 6.5  4 : 06-050315-1-div-CF3I-2-div-ND3-Cu-6-bar-Ar-1080k-FT-high_res - Overlays   :  10:<LineList>
    5 E   36     4 E   33    10640.2620    10640.2490        0.0130 1.00000 9.1e-8 0.0000 : qR1(4)6,5.5,5,5,4.5,4 : v=0  5  1 E  6 5.5  5 - v=0  4  1 E  5 4.5  4 : 06-050315-1-div-CF3I-2-div-ND3-Cu-6-bar-Ar-1080k-FT-high_res - Overlays     :  11:<LineList>
    6 E   20     5 E   19    10643.6270    10643.6289       -0.0019 1.00000 1.3e-7 0.0000 : qR1(4)4,5.5,6,3,4.5,5 : v=0  5  1 E  4 5.5  6 - v=0  4  1 E  3 4.5  5 : 06-050315-1-div-CF3I-2-div-ND3-Cu-6-bar-Ar-1080k-FT-high_res - Overlays     :  12:<LineList>
    8 E    5     7 E    5    10643.6270    10643.6243        0.0027 1.00000 1.7e-7 0.0000 : qR1(4)6,7.5,8,5,6.5,7 : v=0  5  1 E  6 7.5  8 - v=0  4  1 E  5 6.5  7 : 06-050315-1-div-CF3I-2-div-ND3-Cu-6-bar-Ar-1080k-FT-high_res - Overlays     :  13:<LineList>
    6 E   22     5 E   21    10645.5110    10645.5080        0.0030 1.00000 2.5e-7 0.0000 : qR1(4)5,5.5,6,4,5.5,5 : v=0  5  1 E  5 5.5  6 - v=0  4  1 E  4 5.5  5 : 06-050315-1-div-CF3I-2-div-ND3-Cu-6-bar-Ar-1080k-FT-high_res - Overlays     :  15:<LineList>
    7 E   12     6 E   12    10645.7250    10645.6959        0.0291 1.00000 3.0e-7 0.0000 : qR1(4)6,6.5,7,5,5.5,6 : v=0  5  1 E  6 6.5  7 - v=0  4  1 E  5 5.5  6 : 06-050315-1-div-CF3I-2-div-ND3-Cu-6-bar-Ar-1080k-FT-high_res - Overlays     :  17:<LineList>
    5 E   32     4 E   29    10645.7250    10645.7177        0.0073 1.00000 2.1e-7 0.0000 : qR1(4)4,5.5,5,3,4.5,4 : v=0  5  1 E  4 5.5  5 - v=0  4  1 E  3 4.5  4 : 06-050315-1-div-CF3I-2-div-ND3-Cu-6-bar-Ar-1080k-FT-high_res - Overlays     :  18:<LineList>
    4 A2  18     3 A1  15    10646.0980    10646.1126       -0.0146 1.00000 2.1e-7 0.0000 : qR0(4)5,3.5,4,4,2.5,3 : v=0  5  0 A2  5 3.5  4 - v=0  4  0 A1  4 2.5  3 : 06-050315-1-div-CF3I-2-div-ND3-Cu-6-bar-Ar-1080k-FT-high_res - Overlays   :  19:<LineList>
    4 E   48     3 E   41    10646.0980    10646.0991       -0.0011 1.00000 1.6e-7 0.0000 : qR1(4)5,6.5,4,4,5.5,3 : v=0  5  1 E  5 6.5  4 - v=0  4  1 E  4 5.5  3 : 06-050315-1-div-CF3I-2-div-ND3-Cu-6-bar-Ar-1080k-FT-high_res - Overlays     :  20:<LineList>
    8 E    6     7 E    6    10650.5500    10650.5347        0.0153 1.00000 1.8e-7 0.0000 : qR1(4)5,6.5,8,4,5.5,7 : v=0  5  1 E  5 6.5  8 - v=0  4  1 E  4 5.5  7 : 06-050315-1-div-CF3I-2-div-ND3-Cu-6-bar-Ar-1080k-FT-high_res - Overlays     :  21:<LineList>
    7 E   13     6 E   13    10650.6410    10650.6510       -0.0100 1.00000 1.5e-7 0.0000 : qR1(4)4,5.5,7,3,4.5,6 : v=0  5  1 E  4 5.5  7 - v=0  4  1 E  3 4.5  6 : 06-050315-1-div-CF3I-2-div-ND3-Cu-6-bar-Ar-1080k-FT-high_res - Overlays     :  22:<LineList>
    9 E    2     8 E    2    10650.6410    10650.6490       -0.0080 1.00000 2.0e-7 0.0000 : qR1(4)6,7.5,9,5,6.5,8 : v=0  5  1 E  6 7.5  9 - v=0  4  1 E  5 6.5  8 : 06-050315-1-div-CF3I-2-div-ND3-Cu-6-bar-Ar-1080k-FT-high_res - Overlays     :  23:<LineList>
    6 A2   9     5 A1   9    10651.1860    10651.2025       -0.0165 1.00000 1.3e-7 0.0000 : qR0(4)6,4.5,6,5,3.5,5 : v=0  5  0 A2  6 4.5  6 - v=0  4  0 A1  5 3.5  5 : 06-050315-1-div-CF3I-2-div-ND3-Cu-6-bar-Ar-1080k-FT-high_res - Overlays   :  24:<LineList>
    4 A2  19     3 A1  16    10651.1860    10651.2035       -0.0175 1.00000 8.2e-8 0.0000 : qR0(4)4,2.5,4,3,1.5,3 : v=0  5  0 A2  4 2.5  4 - v=0  4  0 A1  3 1.5  3 : 06-050315-1-div-CF3I-2-div-ND3-Cu-6-bar-Ar-1080k-FT-high_res - Overlays   :  25:<LineList>
    9 A1   2     8 A2   2    12777.9370    12777.9472       -0.0102 1.00000 6.4e-7 0.0000 : qR0(5)7,8.5,9,6,7.5,8 : v=0  6  0 A1  7 8.5  9 - v=0  5  0 A2  6 7.5  8 : 06-050315-1-div-CF3I-2-div-ND3-Cu-6-bar-Ar-1080k-FT-high_res - Overlays   :  27:<LineList>
    7 A1   8     6 A2   8    12777.9370    12777.9452       -0.0082 1.00000 5.0e-7 0.0000 : qR0(5)5,6.5,7,4,5.5,6 : v=0  6  0 A1  5 6.5  7 - v=0  5  0 A2  4 5.5  6 : 06-050315-1-div-CF3I-2-div-ND3-Cu-6-bar-Ar-1080k-FT-high_res - Overlays   :  28:<LineList>
    5 E   52     4 E   49    12777.9370    12777.9727       -0.0357 1.00000 2.5e-7 0.0000 : qR1(5)7,7.5,5,6,6.5,4 : v=0  6  1 E  7 7.5  5 - v=0  5  1 E  6 6.5  4 : 06-050315-1-div-CF3I-2-div-ND3-Cu-6-bar-Ar-1080k-FT-high_res - Overlays     :  29:<LineList>
    8 A1   5     7 A2   5    12779.1180    12779.1106        0.0074 1.00000 5.6e-7 0.0000 : qR0(5)7,7.5,8,6,6.5,7 : v=0  6  0 A1  7 7.5  8 - v=0  5  0 A2  6 6.5  7 : 06-050315-1-div-CF3I-2-div-ND3-Cu-6-bar-Ar-1080k-FT-high_res - Overlays   :  31:<LineList>
    6 A1  15     5 A2  15    12779.1180    12779.1142        0.0038 1.00000 4.2e-7 0.0000 : qR0(5)5,5.5,6,4,5.5,5 : v=0  6  0 A1  5 5.5  6 - v=0  5  0 A2  4 5.5  5 : 06-050315-1-div-CF3I-2-div-ND3-Cu-6-bar-Ar-1080k-FT-high_res - Overlays   :  32:<LineList>
    8 A1   6     7 A2   6    12782.6960    12782.6898        0.0062 1.00000 5.9e-7 0.0000 : qR0(5)5,6.5,8,4,5.5,7 : v=0  6  0 A1  5 6.5  8 - v=0  5  0 A2  4 5.5  7 : 06-050315-1-div-CF3I-2-div-ND3-Cu-6-bar-Ar-1080k-FT-high_res - Overlays   :  33:<LineList>
   10 A1   1     9 A2   1    12782.6960    12782.6942        0.0018 1.00000 7.4e-7 0.0000 : qR0(5)7,8.5,10,6,7.5,9 : v=0  6  0 A1  7 8.5 10 - v=0  5  0 A2  6 7.5  9 : 06-050315-1-div-CF3I-2-div-ND3-Cu-6-bar-Ar-1080k-FT-high_res - Overlays  :  34:<LineList>
    7 A1  14     6 A2  13    12783.3910    12783.3780        0.0130 1.00000 4.9e-7 0.0000 : qR0(5)5,5.5,7,4,4.5,6 : v=0  6  0 A1  5 5.5  7 - v=0  5  0 A2  4 4.5  6 : 06-050315-1-div-CF3I-2-div-ND3-Cu-6-bar-Ar-1080k-FT-high_res - Overlays   :  35:<LineList>
    9 A1   4     8 A2   4    12783.3910    12783.3796        0.0114 1.00000 6.4e-7 0.0000 : qR0(5)7,7.5,9,6,6.5,8 : v=0  6  0 A1  7 7.5  9 - v=0  5  0 A2  6 6.5  8 : 06-050315-1-div-CF3I-2-div-ND3-Cu-6-bar-Ar-1080k-FT-high_res - Overlays   :  36:<LineList>
    5 E   65     4 E   62    17037.2580    17037.2691       -0.0111 1.00000 3.6e-7 0.0000 : qR1(7)9,7.5,5,8,6.5,4 : v=0  8  1 E  9 7.5  5 - v=0  7  1 E  8 6.5  4 : 06-050315-1-div-CF3I-2-div-ND3-Cu-6-bar-Ar-1080k-FT-high_res - Overlays     :  37:<LineList>
    5 E   67     4 E   64    17037.2580    17037.2451        0.0129 1.00000 3.5e-7 0.0000 : qR1(7)7,7.5,5,6,6.5,4 : v=0  8  1 E  7 7.5  5 - v=0  7  1 E  6 6.5  4 : 06-050315-1-div-CF3I-2-div-ND3-Cu-6-bar-Ar-1080k-FT-high_res - Overlays     :  38:<LineList>
    7 E   53     6 E   53    17037.2580    17037.2556        0.0024 1.00000 5.0e-7 0.0000 : qR1(7)9,9.5,7,8,8.5,6 : v=0  8  1 E  9 9.5  7 - v=0  7  1 E  8 8.5  6 : 06-050315-1-div-CF3I-2-div-ND3-Cu-6-bar-Ar-1080k-FT-high_res - Overlays     :  39:<LineList>
   10 E   11     9 E   11    17037.2580    17037.2549        0.0031 1.00000 7.2e-7 0.0000 : qR1(7)8,9.5,10,7,8.5,9 : v=0  8  1 E  8 9.5 10 - v=0  7  1 E  7 8.5  9 : 06-050315-1-div-CF3I-2-div-ND3-Cu-6-bar-Ar-1080k-FT-high_res - Overlays    :  40:<LineList>
    6 E   54     5 E   53    17037.4350    17037.4318        0.0032 1.00000 4.2e-7 0.0000 : qR1(7)7,5.5,6,6,4.5,5 : v=0  8  1 E  7 5.5  6 - v=0  7  1 E  6 4.5  5 : 06-050315-1-div-CF3I-2-div-ND3-Cu-6-bar-Ar-1080k-FT-high_res - Overlays     :  41:<LineList>
    8 E   31     7 E   31    17037.4350    17037.4382       -0.0032 1.00000 5.7e-7 0.0000 : qR1(7)9,7.5,8,8,6.5,7 : v=0  8  1 E  9 7.5  8 - v=0  7  1 E  8 6.5  7 : 06-050315-1-div-CF3I-2-div-ND3-Cu-6-bar-Ar-1080k-FT-high_res - Overlays     :  42:<LineList>
   10 A1   8    10 A2   4    17038.5080    17038.5590       -0.0510 1.00000 2.0e-8 0.0000 : qR0(7)9,8.5,10,8,8.5,10 : v=0  8  0 A1  9 8.5 10 - v=0  7  0 A2  8 8.5 10 : 06-050315-1-div-CF3I-2-div-ND3-Cu-6-bar-Ar-1080k-FT-high_res - Overlays :  43:<LineList>
    8 A1  20     8 A2  15    17038.5080    17038.5658       -0.0578 1.00000 1.6e-8 0.0000 : qR0(7)7,6.5,8,6,6.5,8 : v=0  8  0 A1  7 6.5  8 - v=0  7  0 A2  6 6.5  8 : 06-050315-1-div-CF3I-2-div-ND3-Cu-6-bar-Ar-1080k-FT-high_res - Overlays   :  44:<LineList>
    9 A1  14     9 A2   9    17038.5080    17038.5053        0.0027 1.00000 1.5e-8 0.0000 : qR0(7)8,7.5,9,7,7.5,9 : v=0  8  0 A1  8 7.5  9 - v=0  7  0 A2  7 7.5  9 : 06-050315-1-div-CF3I-2-div-ND3-Cu-6-bar-Ar-1080k-FT-high_res - Overlays   :  45:<LineList>
    9 E   21     8 E   21    17038.5080    17038.5124       -0.0044 1.00000 6.2e-7 0.0000 : qR1(7)9,8.5,9,8,7.5,8 : v=0  8  1 E  9 8.5  9 - v=0  7  1 E  8 7.5  8 : 06-050315-1-div-CF3I-2-div-ND3-Cu-6-bar-Ar-1080k-FT-high_res - Overlays     :  46:<LineList>
    6 A1  25     5 A2  25    17038.5080    17038.4905        0.0175 1.00000 5.4e-7 0.0000 : qR0(7)7,5.5,6,6,4.5,5 : v=0  8  0 A1  7 5.5  6 - v=0  7  0 A2  6 4.5  5 : 06-050315-1-div-CF3I-2-div-ND3-Cu-6-bar-Ar-1080k-FT-high_res - Overlays   :  47:<LineList>
    8 A1  13     7 A2  13    17038.5080    17038.4984        0.0096 1.00000 7.2e-7 0.0000 : qR0(7)9,7.5,8,8,6.5,7 : v=0  8  0 A1  9 7.5  8 - v=0  7  0 A2  8 6.5  7 : 06-050315-1-div-CF3I-2-div-ND3-Cu-6-bar-Ar-1080k-FT-high_res - Overlays   :  48:<LineList>
    7 E   44     6 E   44    17038.5080    17038.5150       -0.0070 1.00000 4.8e-7 0.0000 : qR1(7)7,6.5,7,6,5.5,6 : v=0  8  1 E  7 6.5  7 - v=0  7  1 E  6 5.5  6 : 06-050315-1-div-CF3I-2-div-ND3-Cu-6-bar-Ar-1080k-FT-high_res - Overlays     :  49:<LineList>
   10 A1   5     9 A2   5    17038.8040    17038.7629        0.0411 1.00000 9.3e-7 0.0000 : qR0(7)9,9.5,10,8,8.5,9 : v=0  8  0 A1  9 9.5 10 - v=0  7  0 A2  8 8.5  9 : 06-050315-1-div-CF3I-2-div-ND3-Cu-6-bar-Ar-1080k-FT-high_res - Overlays  :  50:<LineList>
    8 A1  15     7 A2  15    17038.8040    17038.7587        0.0453 1.00000 7.4e-7 0.0000 : qR0(7)7,7.5,8,6,6.5,7 : v=0  8  0 A1  7 7.5  8 - v=0  7  0 A2  6 6.5  7 : 06-050315-1-div-CF3I-2-div-ND3-Cu-6-bar-Ar-1080k-FT-high_res - Overlays   :  51:<LineList>

SVD fit: 46 Observations,  6 Parameters (scaled)
Initial Average Error: 0.0209582588944594
Predicted New Error:   0.0209582588940661
Parameters:
  # Old                 New                 Std Dev   Change/Std Sens    Summary              Name
  1 1064.91347937384    1064.91347937122    .00073182    0.0000  2.81e-5 1064.91348(73)       v=0 B
  2 9.0703654146297e-5  9.0703686911787e-5  7.1554e-6    0.0000  2.75e-7 9.07(72)e-5          v=0 DJ
  3 .00966031822282912  .00966031262283016  .00053585    0.0000  4.19e-5 9.66(54)e-3          v=0 DJK
  4 -2.58983335692657   -2.58984062665153   .18981056    0.0000  .018569 -2.59(19)            N eQq
  5 63.7458594721664    63.7458574326895    .16568852    0.0000  .015595 63.75(17)            Cu eQq
  6 -612.863497108735   -612.863499578565   .49282621    0.0000  .048306 -612.86(49)          I eQq

Correlation Matrix
Determinant = 0.069, Largest off-diagonal element = 0.870 at 2,1 = v=0 DJ, v=0 B
       1       2       3       4       5       6
  1   1.000
  2   0.870   1.000
  3   0.166  -0.190   1.000
  4   0.190   0.015   0.185   1.000
  5  -0.117  -0.224   0.107   0.312   1.000
  6  -0.006  -0.070   0.254   0.118  -0.328   1.000
