# Supplementary material for: Gas phase complexes of H3N⋯CuF and H3N⋯CuI studied by rotational spectroscopy and ab initio calculations: the effect of X (X = F, Cl, Br, I) in OC⋯CuX and H3N⋯CuX
Source: Royal Society of Chemistry journal article supplement (doi:10.1039/c6cp01368f), 2016-01-01
Supplement: c6cp01368f3.log [file c6cp01368f3.log]

Pgopher 9.0.171 14 Dec 2015 22:26 32 bit (Delphi 18.5/18)
Mixture: D3N65CuI.pgo
  Units               MHz
  PrintLevel          Detail
  Precision           4
  BasisOrder          boDefault
  QuantumNumberFormat J
  FitCycles           1
  FitDetails          False
  AutoReplot          True
  AllowComplex        False
  NoLineList          False
  ShowEstUnc          False
  ShowDerivatives     False
  SVDlimit            5
  ShowSubBasis        False
  AllowZeroI          False
  ScaledParameters    True
  SVDThresh    1E-6
  ScaleChanges 1
  SmallE       5.99584916E-14
  Species: Species
    Jmin 0
    Jmax 60
    Concentration 1
    SymmetricMolecule: D3N63CuI
      nNuclei        3
      Jmax           30
      Colour         Red
      JAdjustSym     False
      BlockMatrix    True
      PointGroup     C3v
      AlternateBasis False
      SymmetryLabels Required
      CompactKLabels False
      wt(A1,A2)      1
      wt(E)          1
      (Wt2)          1
      (Wt3)          1
      (Wt4)          1
      (Wt5)          1
      (Wt6)          1
      (Wt7)          1
      (Wt8)          1
      (Wt9)          1
      (Wt10)         1
      (Wt11)         1
      (Wt12)         1
      (Wt13)         1
      Abundance     1
      AssumedOrigin 1E99
      SymmetricManifold: Ground
        Jmin          0
        Jmax          30
        Initial       True
        EigenSearch   True
        LimitSearch   False
        AutoQConverge True
        UsePopParams  False
        SymmetricTop: v=0
          Symmetry A1
          Kmin     0
          Kmax     1
          B   1058.27043699249           Float
          C   95751
          DJ  9.7E-5
          DJK 0.0109149579979402         Float
          <N  ,K  ,l  |B|N,K,l> = N*(N+1)-K^2

          <N  ,K  ,l  |C|N,K,l> = K^2

          <N  ,K  ,l  |DJ|N,K,l> = -N^2*(N+1)^2

          <N  ,K  ,l  |DJK|N,K,l> = -N*(N+1)*K^2

          symmetricTopNucleus: N
            Spin   1
            AsNext False
            MaxDJ  -0.5
            eQq -2.82174363352369          Float
            Matrix elements for eQq not available
          symmetricTopNucleus: Cu
            Spin   1.5
            AsNext False
            MaxDJ  -0.5
            eQq 58.9930968941052           Float
            Matrix elements for eQq not available
          symmetricTopNucleus: I
            Spin   2.5
            AsNext False
            MaxDJ  -0.5
            eQq -614.323878478765          Float
            Matrix elements for eQq not available
      TransitionMoments: <Ground|mu|Ground>
        CartesianTransitionMoment: <v=0|a|v=0>
          Axis a
          Strength 0.66
        Symbolic Matrix Elements not available for <v=0|a|v=0>
  Simulation: Simulation
    Intensity factor:0.333333333333333 (1 from Spol)
    IntensityUnits Normalized
    LifeModel      lmNone
    PlotUnits      MHz
    nDF            2000
    WidthMult      6
    AutoMin        True
    AutoMax        True
    ShowSum        False
    ShowParts      True
    ShowFortrat    False
    UseUpper       False
    ShowSymmetry   True
    ShowDeltaJ     False
    ScaleMarkSize  True
    UseSymmetry    False
    UseStateNumber False
    FortratQno     J
    Fmin        8293.53046155223
    Fmax        8739.35899122798
    Ymax        1.93162120207301E-5
    Temperature 30
    Gaussian    0.03
    SMargin     -1
    OThreshold  1E-6
    Tvib        -1
    Tspin       -1
    PlotSplit   0.5
  Fundamental Constants from CODATA 2014: h=6.62607004E-34 k=1.38064852E-23 NA=6.022140857E23 e=1.6021766208E-19 me=9.10938356E-31


Residuals before fit for D3N63CuI for the Ground manifold
    F'S'   #'    F"S"   #"     Observed    Calculated      Obs-Calc StdDev 
    5 A2  13     4 A1  12    10579.9190    10579.9182        0.0008 1.00000 2.6e-7 0.0000 : qR0(4)6,4.5,5,5,3.5,4 : v=0  5  0 A2  6 4.5  5 - v=0  4  0 A1  5 3.5  4 : 06-050315-1-div-CF3I-2-div-ND3-Cu-6-bar-Ar-1080k-FT-high_res - Overlays :   1:<LineList>
    3 A2  21     2 A1  15    10579.9190    10579.9200       -0.0010 1.00000 1.5e-7 0.0000 : qR0(4)4,2.5,3,3,1.5,2 : v=0  5  0 A2  4 2.5  3 - v=0  4  0 A1  3 1.5  2 : 06-050315-1-div-CF3I-2-div-ND3-Cu-6-bar-Ar-1080k-FT-high_res - Overlays :   2:<LineList>
    8 A2   2     7 A1   2    10580.5490    10580.5454        0.0036 1.00000 4.6e-7 0.0000 : qR0(4)6,7.5,8,5,6.5,7 : v=0  5  0 A2  6 7.5  8 - v=0  4  0 A1  5 6.5  7 : 06-050315-1-div-CF3I-2-div-ND3-Cu-6-bar-Ar-1080k-FT-high_res - Overlays :   3:<LineList>
    6 A2   8     5 A1   8    10580.5490    10580.5457        0.0033 1.00000 3.5e-7 0.0000 : qR0(4)4,5.5,6,3,4.5,5 : v=0  5  0 A2  4 5.5  6 - v=0  4  0 A1  3 4.5  5 : 06-050315-1-div-CF3I-2-div-ND3-Cu-6-bar-Ar-1080k-FT-high_res - Overlays :   4:<LineList>
    6 A2  10     5 A1  10    10582.1130    10582.1142       -0.0012 1.00000 3.2e-7 0.0000 : qR0(4)5,5.5,6,4,5.5,5 : v=0  5  0 A2  5 5.5  6 - v=0  4  0 A1  4 5.5  5 : 06-050315-1-div-CF3I-2-div-ND3-Cu-6-bar-Ar-1080k-FT-high_res - Overlays :   5:<LineList>
    7 A2   5     6 A1   5    10582.3230    10582.3176        0.0054 1.00000 3.8e-7 0.0000 : qR0(4)6,6.5,7,5,5.5,6 : v=0  5  0 A2  6 6.5  7 - v=0  4  0 A1  5 5.5  6 : 06-050315-1-div-CF3I-2-div-ND3-Cu-6-bar-Ar-1080k-FT-high_res - Overlays :   6:<LineList>
    7 E   13     6 E   13    10584.2620    10584.2759       -0.0139 1.00000 3.2e-7 0.0000 : qR1(4)4,5.5,7,3,4.5,6 : v=0  5  1 E  4 5.5  7 - v=0  4  1 E  3 4.5  6 : 06-050315-1-div-CF3I-2-div-ND3-Cu-6-bar-Ar-1080k-FT-high_res - Overlays   :   7:<LineList>
    9 E    2     8 E    2    10584.2620    10584.2740       -0.0120 1.00000 4.2e-7 0.0000 : qR1(4)6,7.5,9,5,6.5,8 : v=0  5  1 E  6 7.5  9 - v=0  4  1 E  5 6.5  8 : 06-050315-1-div-CF3I-2-div-ND3-Cu-6-bar-Ar-1080k-FT-high_res - Overlays   :   8:<LineList>
    8 A2   3     7 A1   3    10587.7800    10587.7650        0.0150 1.00000 4.8e-7 0.0000 : qR0(4)5,6.5,8,4,5.5,7 : v=0  5  0 A2  5 6.5  8 - v=0  4  0 A1  4 5.5  7 : 06-050315-1-div-CF3I-2-div-ND3-Cu-6-bar-Ar-1080k-FT-high_res - Overlays :   9:<LineList>
    9 E    3     8 E    3    10587.7800    10587.7541        0.0259 1.00000 4.4e-7 0.0000 : qR1(4)5,6.5,9,4,5.5,8 : v=0  5  1 E  5 6.5  9 - v=0  4  1 E  4 5.5  8 : 06-050315-1-div-CF3I-2-div-ND3-Cu-6-bar-Ar-1080k-FT-high_res - Overlays   :  10:<LineList>
    7 A2   8     6 A1   8    10588.5690    10588.5929       -0.0239 1.00000 3.9e-7 0.0000 : qR0(4)5,5.5,7,4,4.5,6 : v=0  5  0 A2  5 5.5  7 - v=0  4  0 A1  4 4.5  6 : 06-050315-1-div-CF3I-2-div-ND3-Cu-6-bar-Ar-1080k-FT-high_res - Overlays :  11:<LineList>
    8 A2   4     7 A1   4    10588.7650    10588.7607        0.0043 1.00000 2.0e-7 0.0000 : qR0(4)6,6.5,8,5,5.5,7 : v=0  5  0 A2  6 6.5  8 - v=0  4  0 A1  5 5.5  7 : 06-050315-1-div-CF3I-2-div-ND3-Cu-6-bar-Ar-1080k-FT-high_res - Overlays :  12:<LineList>
    8 E   10     7 E   10    10588.7650    10588.7649        0.0001 1.00000 1.8e-7 0.0000 : qR1(4)5,5.5,8,4,4.5,7 : v=0  5  1 E  5 5.5  8 - v=0  4  1 E  4 4.5  7 : 06-050315-1-div-CF3I-2-div-ND3-Cu-6-bar-Ar-1080k-FT-high_res - Overlays   :  13:<LineList>
    6 A2  13     5 A1  13    10588.7650    10588.7714       -0.0064 1.00000 1.5e-7 0.0000 : qR0(4)4,4.5,6,3,3.5,5 : v=0  5  0 A2  4 4.5  6 - v=0  4  0 A1  3 3.5  5 : 06-050315-1-div-CF3I-2-div-ND3-Cu-6-bar-Ar-1080k-FT-high_res - Overlays :  14:<LineList>

SVD fit: 14 Observations,  5 Parameters (scaled)
Initial Average Error: 0.0146042845006514
Predicted New Error:   0.0146042844998479
Parameters:
  # Old                 New                 Std Dev   Change/Std Sens    Summary              Name
  1 1058.27043699249    1058.27043698842    .00050269    0.0000  2.92e-5 1058.27044(50)       v=0 B
  2 .0109149579979402   .0109149294925849   .00095174    0.0000  5.46e-5 0.01091(95)          v=0 DJK
  3 -2.82174363352369   -2.82174225736285   .18386685    0.0000  .011359 -2.82(18)            N eQq
  4 58.9930968941052    58.9930977487809    .40826484    0.0000  .026005 58.99(41)            Cu eQq
  5 -614.323878478765   -614.323868225865   .77252315    0.0000  .042403 -614.32(77)          I eQq

Correlation Matrix
Determinant = 0.340, Largest off-diagonal element = 0.422 at 5,3 = I eQq, N eQq
       1       2       3       4       5
  1   1.000
  2   0.329   1.000
  3   0.228   0.068   1.000
  4   0.034  -0.236  -0.407   1.000
  5   0.366  -0.294   0.422  -0.133   1.000
