# Supplementary material for: Gas phase complexes of H3N⋯CuF and H3N⋯CuI studied by rotational spectroscopy and ab initio calculations: the effect of X (X = F, Cl, Br, I) in OC⋯CuX and H3N⋯CuX
Source: Royal Society of Chemistry journal article supplement (doi:10.1039/c6cp01368f), 2016-01-01
Supplement: c6cp01368f5.log [file c6cp01368f5.log]

Pgopher 9.0.171 14 Dec 2015 22:26 32 bit (Delphi 18.5/18)
Mixture: H315N63CuF.pgo
  Units               MHz
  PrintLevel          Detail
  Precision           4
  BasisOrder          boDefault
  QuantumNumberFormat J
  FitCycles           1
  FitDetails          False
  AutoReplot          True
  AllowComplex        False
  NoLineList          False
  ShowEstUnc          False
  ShowDerivatives     False
  SVDlimit            5
  ShowSubBasis        False
  AllowZeroI          False
  ScaledParameters    True
  SVDThresh    1E-6
  ScaleChanges 1
  SmallE       5.99584916E-14
  Species: Species
    Jmax 60
    Concentration 1
    SymmetricMolecule: H315N63CuF
      nNuclei        2
      JAdjustSym     False
      BlockMatrix    True
      PointGroup     C3v
      AlternateBasis False
      SymmetryLabels Required
      CompactKLabels False
      wt(A1,A2)      1
      wt(E)          1
      (Wt2)          1
      (Wt3)          1
      (Wt4)          1
      (Wt5)          1
      (Wt6)          1
      (Wt7)          1
      (Wt8)          1
      (Wt9)          1
      (Wt10)         1
      (Wt11)         1
      (Wt12)         1
      (Wt13)         1
      Abundance     1
      AssumedOrigin 1E99
      SymmetricManifold: Ground
        Initial       True
        EigenSearch   True
        LimitSearch   False
        AutoQConverge True
        UsePopParams  False
        SymmetricTop: v=0
          Symmetry A1
          Kmin     0
          Kmax     0
          B  3926.69441789034           Float
          C  189091.497
          DJ 0.00103578829581163        Float
          <N  ,K  ,l  |B|N,K,l> = N*(N+1)-K^2

          <N  ,K  ,l  |C|N,K,l> = K^2

          <N  ,K  ,l  |DJ|N,K,l> = -N^2*(N+1)^2

          symmetricTopNucleus: N
            Spin   0
            AsNext False
            MaxDJ  -0.5
          symmetricTopNucleus: Cu
            Spin   1.5
            AsNext False
            MaxDJ  -0.5
            eQq   66.2123523189294           Float
            Cperp 0.0172606093416928         Float
            Matrix elements for eQq not available
            Matrix elements for Cperp not available
      TransitionMoments: <Ground|mu|Ground>
        CartesianTransitionMoment: <v=0|a|v=0>
          Axis a
          Strength 1
        Symbolic Matrix Elements not available for <v=0|a|v=0>
  Simulation: Simulation
    Intensity factor:0.333333333333333 (1 from Spol)
    IntensityUnits Normalized
    LifeModel      lmNone
    PlotUnits      MHz
    nDF            2000
    WidthMult      6
    AutoMin        True
    AutoMax        True
    ShowSum        True
    ShowParts      False
    ShowFortrat    False
    UseUpper       False
    ShowSymmetry   True
    ShowDeltaJ     False
    ScaleMarkSize  True
    UseSymmetry    False
    UseStateNumber False
    FortratQno     J
    Fmin        15703.1984969727
    Fmax        15708.1137952994
    Ymax        0.302020124780445
    Temperature 3
    Gaussian    0.01
    SMargin     -1
    OThreshold  1E-6
    Tvib        -1
    Tspin       -1
    PlotSplit   0.5
  Fundamental Constants from CODATA 2014: h=6.62607004E-34 k=1.38064852E-23 NA=6.022140857E23 e=1.6021766208E-19 me=9.10938356E-31


Residuals before fit for H315N63CuF for the Ground manifold
    F'S'   #'    F"S"   #"     Observed    Calculated      Obs-Calc StdDev 
  0.5 A2   1   1.5 A1   1     7836.7980     7836.8001       -0.0021 1.00000 .00040 0.0000 : qR0(0)1,0.5,0,1.5 : v=0  1  0 A2  1 0.5 - v=0  0  0 A1  0 1.5 : 030315-1-div-SF6-2-div-15NH3-Cu-6-bar-Ar-540k-FT-high_res - Overlays :   1:<LineList>
  2.5 A2   1   1.5 A1   1     7850.1070     7850.1049        0.0021 1.00000 .00121 0.0000 : qR0(0)1,2.5,0,1.5 : v=0  1  0 A2  1 2.5 - v=0  0  0 A1  0 1.5 : 030315-1-div-SF6-2-div-15NH3-Cu-6-bar-Ar-540k-FT-high_res - Overlays :   2:<LineList>
  1.5 A2   1   1.5 A1   1     7866.6190     7866.6190       -0.0000 1.00000 .00081 0.0000 : qR0(0)1,1.5,0,1.5 : v=0  1  0 A2  1 1.5 - v=0  0  0 A1  0 1.5 : 030315-1-div-SF6-2-div-15NH3-Cu-6-bar-Ar-540k-FT-high_res - Overlays :   3:<LineList>
  1.5 A1   2   1.5 A2   1    15693.4910    15693.4817        0.0093 1.00000 .00086 0.0000 : qR0(1)2,1.5,1,1.5 : v=0  2  0 A1  2 1.5 - v=0  1  0 A2  1 1.5 : 030315-1-div-SF6-2-div-15NH3-Cu-6-bar-Ar-540k-FT-high_res - Overlays :   4:<LineList>
  3.5 A1   1   2.5 A2   1    15705.3490    15705.3537       -0.0047 1.00000 .00321 0.0000 : qR0(1)2,3.5,1,2.5 : v=0  2  0 A1  2 3.5 - v=0  1  0 A2  1 2.5 : 030315-1-div-SF6-2-div-15NH3-Cu-6-bar-Ar-540k-FT-high_res - Overlays :   5:<LineList>
  0.5 A1   1   0.5 A2   1    15706.7000    15706.7100       -0.0100 1.00000 .00067 0.0000 : qR0(1)2,0.5,1,0.5 : v=0  2  0 A1  2 0.5 - v=0  1  0 A2  1 0.5 : 030315-1-div-SF6-2-div-15NH3-Cu-6-bar-Ar-540k-FT-high_res - Overlays :   6:<LineList>
  1.5 A1   2   0.5 A2   1    15723.3060    15723.3006        0.0054 1.00000 .00067 0.0000 : qR0(1)2,1.5,1,0.5 : v=0  2  0 A1  2 1.5 - v=0  1  0 A2  1 0.5 : 030315-1-div-SF6-2-div-15NH3-Cu-6-bar-Ar-540k-FT-high_res - Overlays :   7:<LineList>

SVD fit: 7 Observations,  4 Parameters (scaled)
Initial Average Error: 0.0090713630582462
Predicted New Error:   0.00907136305822957
Parameters:
  # Old                 New                 Std Dev   Change/Std Sens    Summary              Name
  1 3926.69441789034    3926.69441790175    .00362061    0.0000  6.88e-5 3926.6944(36)        v=0 B
  2 .00103578829581162  .00103578983440024  .00048105    0.0000  9.32e-6 1.04(48)e-3          v=0 DJ
  3 66.2123523189294    66.2123523199315    .02102447    0.0000  .001316 66.212(21)           Cu eQq
  4 .0172606093416928   .0172606119897174   .00234588    0.0000  .000134 0.0173(23)           Cu Cperp

Correlation Matrix
Determinant = 0.074, Largest off-diagonal element = 0.948 at 2,1 = v=0 DJ, v=0 B
       1       2       3       4
  1   1.000
  2   0.948   1.000
  3   0.058   0.098   1.000
  4   0.208   0.079  -0.299   1.000
