# Supplementary material for: Gas phase complexes of H3N⋯CuF and H3N⋯CuI studied by rotational spectroscopy and ab initio calculations: the effect of X (X = F, Cl, Br, I) in OC⋯CuX and H3N⋯CuX
Source: Royal Society of Chemistry journal article supplement (doi:10.1039/c6cp01368f), 2016-01-01
Supplement: c6cp01368f6.log [file c6cp01368f6.log]

Pgopher 9.0.100 14 Jun 2015 12:49 64 bit Unicode (Delphi 29/29)
Mixture: H3NCuI_15N.pgo
  Units               MHz
  PrintLevel          Detail
  Precision           4
  BasisOrder          boDefault
  QuantumNumberFormat J
  FitCycles           1
  FitDetails          False
  AutoReplot          True
  AllowComplex        False
  NoLineList          False
  ShowEstUnc          False
  ShowDerivatives     False
  SVDlimit            5
  ShowSubBasis        False
  AllowZeroI          False
  ScaledParameters    True
  SVDThresh    1E-6
  ScaleChanges 1
  SmallE       5.99584916E-14
  Species: Species
    Jmin 0
    Jmax 60
    Concentration 1
    SymmetricMolecule: abundant
      nNuclei        2
      Jmax           30
      Colour         Red
      JAdjustSym     False
      BlockMatrix    True
      PointGroup     C3v
      AlternateBasis False
      SymmetryLabels Required
      CompactKLabels False
      wt(A1,A2)      1
      wt(E)          1
      (Wt2)          1
      (Wt3)          1
      (Wt4)          1
      (Wt5)          1
      (Wt6)          1
      (Wt7)          1
      (Wt8)          1
      (Wt9)          1
      (Wt10)         1
      (Wt11)         1
      (Wt12)         1
      (Wt13)         1
      Abundance     1
      AssumedOrigin 1E99
      SymmetricManifold: Ground
        Jmin          0
        Jmax          30
        Initial       True
        EigenSearch   True
        LimitSearch   False
        AutoQConverge True
        UsePopParams  False
        SymmetricTop: v=0
          Symmetry A1
          Kmin     0
          Kmax     1
          B   1135.26715145372           Float
          C   185751
          DJ  0.000104808920891426       Float
          DJK 0.0141520114921765         Float
          <N  ,K  ,l  |B|N,K,l> = N*(N+1)-K^2

          <N  ,K  ,l  |C|N,K,l> = K^2

          <N  ,K  ,l  |DJ|N,K,l> = -N^2*(N+1)^2

          <N  ,K  ,l  |DJK|N,K,l> = -N*(N+1)*K^2

          symmetricTopNucleus: N
            Spin   2.5
            AsNext False
            eQq -614.248724710219          Float
            Matrix elements for eQq not available
          symmetricTopNucleus: Cu
            Spin   1.5
            AsNext False
            eQq 62.5518226678912           Float
            Matrix elements for eQq not available
      TransitionMoments: <Ground|mu|Ground>
        CartesianTransitionMoment: <v=0|a|v=0>
          Axis a
          Strength 0.66
        Symbolic Matrix Elements not available for <v=0|a|v=0>
  Simulation: Simulation
    Intensity factor:0.333333333333333 (1 from Spol)
    IntensityUnits Normalized
    LifeModel      lmNone
    PlotUnits      MHz
    nDF            2000
    WidthMult      6
    AutoMin        True
    AutoMax        True
    ShowSum        False
    ShowParts      True
    ShowFortrat    False
    UseUpper       False
    ShowSymmetry   True
    ShowDeltaJ     False
    ScaleMarkSize  True
    UseSymmetry    False
    UseStateNumber False
    FortratQno     J
    Fmin        11346.8648802799
    Fmax        11365.7563256647
    Ymax        4.03000860899064E-5
    Temperature 5
    SMargin     -1
    OThreshold  1E-6
    Tvib        -1
    Tspin       -1
    PlotSplit   0.5
  Fundamental Constants from CODATA 2010: h=6.62606957E-34 k=1.3806488E-23 NA=6.02214129E23 e=1.602176565E-19 me=9.10938291E-31


Residuals before fit for abundant for the Ground manifold
    F'S'   #'    F"S"   #"     Observed    Calculated      Obs-Calc StdDev 
    8 A1   5     7 A2   5    18165.0590    18165.0598       -0.0008 1.00000 2.9e-5      0 : qR0(7)8.5,8,7.5,7 : v=0  8  0 A1 8.5  8 - v=0  7  0 A2 7.5  7 : 020315-1-div-CF3I-2-div-15NH3-Cu-6-bar-Ar-FT-180k-high_res - Overlays   :   1:<LineList>
    9 A1   3     8 A2   3    18164.3760    18164.3853       -0.0093 1.00000 3.4e-5      0 : qR0(7)8.5,9,7.5,8 : v=0  8  0 A1 8.5  9 - v=0  7  0 A2 7.5  8 : 020315-1-div-CF3I-2-div-15NH3-Cu-6-bar-Ar-FT-180k-high_res - Overlays   :   2:<LineList>
    7 A1  10     6 A2  10    18161.1980    18161.2166       -0.0186 1.00000 2.7e-5      0 : qR0(7)5.5,7,4.5,6 : v=0  8  0 A1 5.5  7 - v=0  7  0 A2 4.5  6 : 020315-1-div-CF3I-2-div-15NH3-Cu-6-bar-Ar-FT-180k-high_res - Overlays   :   3:<LineList>
    8 A1   8     7 A2   8    18159.2360    18159.2268        0.0092 1.00000 3e-5      0 : qR0(7)6.5,8,5.5,7 : v=0  8  0 A1 6.5  8 - v=0  7  0 A2 5.5  7 : 020315-1-div-CF3I-2-div-15NH3-Cu-6-bar-Ar-FT-180k-high_res - Overlays     :   4:<LineList>
    7 A1   9     6 A2   9    18160.1380    18160.1359        0.0021 1.00000 2.6e-5      0 : qR0(7)6.5,7,5.5,6 : v=0  8  0 A1 6.5  7 - v=0  7  0 A2 5.5  6 : 020315-1-div-CF3I-2-div-15NH3-Cu-6-bar-Ar-FT-180k-high_res - Overlays   :   5:<LineList>
    4 A1  12     3 A2  11    18161.9380    18161.9357        0.0023 1.00000 1.5e-5      0 : qR0(7)5.5,4,4.5,3 : v=0  8  0 A1 5.5  4 - v=0  7  0 A2 4.5  3 : 020315-1-div-CF3I-2-div-15NH3-Cu-6-bar-Ar-FT-180k-high_res - Overlays   :   6:<LineList>
    9 A2   3     8 A1   3    15896.9830    15896.9946       -0.0116 1.00000 3.5e-5      0 : qR0(6)8.5,9,7.5,8 : v=0  7  0 A2 8.5  9 - v=0  6  0 A1 7.5  8 : 020315-1-div-CF3I-2-div-15NH3-Cu-6-bar-Ar-FT-180k-high_res - Overlays   :   7:<LineList>
   10 A2   2     9 A1   2    15895.4180    15895.4237       -0.0057 1.00000 4e-5      0 : qR0(6)9.5,10,8.5,9 : v=0  7  0 A2 9.5 10 - v=0  6  0 A1 8.5  9 : 020315-1-div-CF3I-2-div-15NH3-Cu-6-bar-Ar-FT-180k-high_res - Overlays    :   8:<LineList>
    8 A2   6     7 A1   6    15895.4180    15895.4330       -0.0150 1.00000 3.3e-5      0 : qR0(6)9.5,8,8.5,7 : v=0  7  0 A2 9.5  8 - v=0  6  0 A1 8.5  7 : 020315-1-div-CF3I-2-div-15NH3-Cu-6-bar-Ar-FT-180k-high_res - Overlays   :   9:<LineList>
    9 A2   4     8 A1   4    15895.6540    15895.6636       -0.0096 1.00000 3.6e-5      0 : qR0(6)9.5,9,8.5,8 : v=0  7  0 A2 9.5  9 - v=0  6  0 A1 8.5  8 : 020315-1-div-CF3I-2-div-15NH3-Cu-6-bar-Ar-FT-180k-high_res - Overlays   :  10:<LineList>
    7 A2   7     6 A1   7    15890.1830    15890.1785        0.0045 1.00000 2.6e-5      0 : qR0(6)6.5,7,5.5,6 : v=0  7  0 A2 6.5  7 - v=0  6  0 A1 5.5  6 : 020315-1-div-CF3I-2-div-15NH3-Cu-6-bar-Ar-FT-180k-high_res - Overlays   :  11:<LineList>
    6 A2   8     5 A1   8    15890.1830    15890.1710        0.0120 1.00000 2.2e-5      0 : qR0(6)6.5,6,5.5,5 : v=0  7  0 A2 6.5  6 - v=0  6  0 A1 5.5  5 : 020315-1-div-CF3I-2-div-15NH3-Cu-6-bar-Ar-FT-180k-high_res - Overlays   :  12:<LineList>
    7 A2   8     6 A1   8    15887.0130    15887.0077        0.0053 1.00000 2.6e-5      0 : qR0(6)5.5,7,4.5,6 : v=0  7  0 A2 5.5  7 - v=0  6  0 A1 4.5  6 : 020315-1-div-CF3I-2-div-15NH3-Cu-6-bar-Ar-FT-180k-high_res - Overlays   :  13:<LineList>
    6 A2   9     5 A1   9    15888.3880    15888.3809        0.0071 1.00000 2.2e-5      0 : qR0(6)5.5,6,4.5,5 : v=0  7  0 A2 5.5  6 - v=0  6  0 A1 4.5  5 : 020315-1-div-CF3I-2-div-15NH3-Cu-6-bar-Ar-FT-180k-high_res - Overlays   :  14:<LineList>
    5 E   19     4 E   18    15888.3880    15888.3855        0.0025 1.00000 7.3e-6      0 : qR1(6)6.5,5,5.5,4 : v=0  7  1 E  6.5  5 - v=0  6  1 E  5.5  4 : 020315-1-div-CF3I-2-div-15NH3-Cu-6-bar-Ar-FT-180k-high_res - Overlays   :  15:<LineList>
   10 A1   2     9 A2   2    18163.9600    18163.9443        0.0157 1.00000 3.8e-5      0 : qR0(7)8.5,10,7.5,9 : v=0  8  0 A1 8.5 10 - v=0  7  0 A2 7.5  9 : 020315-1-div-CF3I-2-div-15NH3-Cu-6-bar-Ar-FT-180k-high_res - Overlays  :  16:<LineList>
    8 E   14     7 E   14    18159.3430    18159.3435       -0.0005 1.00000 1.2e-5      0 : qR1(7)6.5,8,5.5,7 : v=0  8  1 E  6.5  8 - v=0  7  1 E  5.5  7 : 020315-1-div-CF3I-2-div-15NH3-Cu-6-bar-Ar-FT-180k-high_res - Overlays   :  17:<LineList>
    8 A2   2     7 A1   2    11355.9760    11355.9738        0.0022 1.00000 2.9e-5      0 : qR0(4)7.5,8,6.5,7 : v=0  5  0 A2 7.5  8 - v=0  4  0 A1 6.5  7 : 020315-1-div-CF3I-2-div-15NH3-Cu-6-bar-Ar-FT-180k-high_res - Overlays   :  18:<LineList>
    6 A2   6     5 A1   6    11355.7810    11355.7963       -0.0153 1.00000 2.2e-5      0 : qR0(4)7.5,6,6.5,5 : v=0  5  0 A2 7.5  6 - v=0  4  0 A1 6.5  5 : 020315-1-div-CF3I-2-div-15NH3-Cu-6-bar-Ar-FT-180k-high_res - Overlays   :  19:<LineList>
    8 A2   1     7 A1   1    11357.7640    11357.7561        0.0079 1.00000 2.8e-5      0 : qR0(4)6.5,8,5.5,7 : v=0  5  0 A2 6.5  8 - v=0  4  0 A1 5.5  7 : 020315-1-div-CF3I-2-div-15NH3-Cu-6-bar-Ar-FT-180k-high_res - Overlays   :  20:<LineList>
    6 E   10     5 E   10    11357.7640    11357.7532        0.0108 1.00000 8.7e-6      0 : qR1(4)7.5,6,6.5,5 : v=0  5  1 E  7.5  6 - v=0  4  1 E  6.5  5 : 020315-1-div-CF3I-2-div-15NH3-Cu-6-bar-Ar-FT-180k-high_res - Overlays   :  21:<LineList>
    7 A2   2     6 A1   2    11350.4570    11350.4638       -0.0068 1.00000 2.4e-5      0 : qR0(4)5.5,7,4.5,6 : v=0  5  0 A2 5.5  7 - v=0  4  0 A1 4.5  6 : 020315-1-div-CF3I-2-div-15NH3-Cu-6-bar-Ar-FT-180k-high_res - Overlays   :  22:<LineList>
    6 A2   3     5 A1   3    11352.2880    11352.2869        0.0011 1.00000 1.9e-5      0 : qR0(4)5.5,6,4.5,5 : v=0  5  0 A2 5.5  6 - v=0  4  0 A1 4.5  5 : 020315-1-div-CF3I-2-div-15NH3-Cu-6-bar-Ar-FT-180k-high_res - Overlays   :  23:<LineList>
   11 A1   1    10 A2   1    18166.3790    18166.3883       -0.0093 1.00000 4.3e-5      0 : qR0(7)9.5,11,8.5,10 : v=0  8  0 A1 9.5 11 - v=0  7  0 A2 8.5 10 : 020315-1-div-CF3I-2-div-15NH3-Cu-6-bar-Ar-FT-180k-high_res - Overlays :  24:<LineList>
   10 A1   3     9 A2   3    18166.7420    18166.7210        0.0210 1.00000 3.8e-5      0 : qR0(7)9.5,10,8.5,9 : v=0  8  0 A1 9.5 10 - v=0  7  0 A2 8.5  9 : 020315-1-div-CF3I-2-div-15NH3-Cu-6-bar-Ar-FT-180k-high_res - Overlays  :  25:<LineList>
    9 A1   5     8 A2   5    18166.9160    18166.9275       -0.0115 1.00000 3.4e-5      0 : qR0(7)9.5,9,8.5,8 : v=0  8  0 A1 9.5  9 - v=0  7  0 A2 8.5  8 : 020315-1-div-CF3I-2-div-15NH3-Cu-6-bar-Ar-FT-180k-high_res - Overlays   :  26:<LineList>
    9 E    7     8 E    7    18163.4190    18163.4052        0.0138 1.00000 1.4e-5      0 : qR1(7)8.5,9,7.5,8 : v=0  8  1 E  8.5  9 - v=0  7  1 E  7.5  8 : 020315-1-div-CF3I-2-div-15NH3-Cu-6-bar-Ar-FT-180k-high_res - Overlays   :  27:<LineList>
    4 A1  12     3 A2  11    18161.9320    18161.9357       -0.0037 1.00000 1.5e-5      0 : qR0(7)5.5,4,4.5,3 : v=0  8  0 A1 5.5  4 - v=0  7  0 A2 4.5  3 : 020315-1-div-CF3I-2-div-15NH3-Cu-6-bar-Ar-FT-180k-high_res - Overlays   :  28:<LineList>
    8 A2   3     7 A1   3    15893.9420    15893.9256        0.0164 1.00000 3.1e-5      0 : qR0(6)7.5,8,6.5,7 : v=0  7  0 A2 7.5  8 - v=0  6  0 A1 6.5  7 : 020315-1-div-CF3I-2-div-15NH3-Cu-6-bar-Ar-FT-180k-high_res - Overlays   :  29:<LineList>
    4 E   21     3 E   19    15887.8360    15887.8614       -0.0254 1.00000 5.8e-6      0 : qR1(6)5.5,4,4.5,3 : v=0  7  1 E  5.5  4 - v=0  6  1 E  4.5  3 : 020315-1-div-CF3I-2-div-15NH3-Cu-6-bar-Ar-FT-180k-high_res - Overlays   :  30:<LineList>
    7 A2   4     6 A1   4    11356.3000    11356.3052       -0.0052 1.00000 2.6e-5      0 : qR0(4)7.5,7,6.5,6 : v=0  5  0 A2 7.5  7 - v=0  4  0 A1 6.5  6 : 020315-1-div-CF3I-2-div-15NH3-Cu-6-bar-Ar-FT-180k-high_res - Overlays   :  31:<LineList>
    9 A2   1     8 A1   1    11355.5920    11355.5762        0.0158 1.00000 3.4e-5      0 : qR0(4)7.5,9,6.5,8 : v=0  5  0 A2 7.5  9 - v=0  4  0 A1 6.5  8 : 020315-1-div-CF3I-2-div-15NH3-Cu-6-bar-Ar-FT-180k-high_res - Overlays   :  32:<LineList>

SVD fit: 32 Observations,  5 Parameters (scaled)
Initial Average Error: 0.0122052011154014
Predicted New Error:   0.0122052011143612
Parameters:
  # Old                 New                 Std Dev   Change/Std Sens    Summary              Name
  1 1135.26715145372    1135.26715140941    .00069689   -0.0001  1.74e-5 1135.26715(70)       v=0 B
  2 .000104808920891426 .000104808499438497 6.3153e-6   -0.0001  1.57e-7 1.048(63)e-4         v=0 DJ
  3 .0141520114921765   .0141520149141184   .00046730    0.0000  4.36e-5 0.01415(47)          v=0 DJK
  4 -614.248724710219   -614.248733539308   .42796186    0.0000  .043211 -614.25(43)          N eQq
  5 62.5518226678912    62.5518229796054    .29351689    0.0000  .030162 62.55(29)            Cu eQq

Correlation Matrix
       1       2       3       4       5
  1   1.000
  2   0.970   1.000
  3   0.158   0.067   1.000
  4   0.321   0.343   0.254   1.000
  5  -0.068  -0.045  -0.401  -0.208   1.000
