# Supplementary material for: Gas phase complexes of H3N⋯CuF and H3N⋯CuI studied by rotational spectroscopy and ab initio calculations: the effect of X (X = F, Cl, Br, I) in OC⋯CuX and H3N⋯CuX
Source: Royal Society of Chemistry journal article supplement (doi:10.1039/c6cp01368f), 2016-01-01
Supplement: c6cp01368f7.log [file c6cp01368f7.log]

Pgopher 8.0.169 24 Jan 2014 9:23 32 bit (Delphi 18.5/18)
Mixture: H3N63CuF.pgo
  Units               MHz
  PrintLevel          Detail
  Precision           4
  BasisOrder          boDefault
  QuantumNumberFormat J
  FitCycles           1
  FitDetails          False
  AutoReplot          True
  AllowComplex        False
  NoLineList          False
  ShowEstUnc          False
  ShowDerivatives     False
  SVDlimit            5
  SVDThresh    1E-15
  ScaleChanges 1
  Species: Species
    Jmax 60
    Concentration 1
    SymmetricMolecule: H3N63CuF
      nNuclei        2
      JAdjustSym     False
      BlockMatrix    True
      PointGroup     C3v
      AlternateBasis False
      wt(A1,A2)      1
      wt(E)          1
      (Wt2)          1
      (Wt3)          1
      (Wt4)          1
      (Wt5)          1
      (Wt6)          1
      (Wt7)          1
      (Wt8)          1
      (Wt9)          1
      (Wt10)         1
      (Wt11)         1
      (Wt12)         1
      (Wt13)         1
      Abundance 1
      SymmetricManifold: Ground
        Initial       True
        EigenSearch   True
        LimitSearch   False
        AutoQConverge True
        UsePopParams  False
        SymmetricTop: v=0
          Symmetry A1
          Kmin     all
          Kmax     all
          B  4037.4553844084            Float
          C  189091.497
          DJ 0.00120171086885127        Float
          symmetricTopNucleus: N
            Spin   1
            AsNext False
            eQq -2.71734443240931          Float
          symmetricTopNucleus: Cu
            Spin   1.5
            AsNext False
            eQq   66.1957004803776           Float
            Cperp 0.0188863185560258         Float
        <N  ,K  ,l  |B|N,K,l> = N*(N+1)-K^2
        <N  ,K  ,l  |C|N,K,l> = K^2
        <N  ,K  ,l  |DJ|N,K,l> = -N^2*(N+1)^2
      TransitionMoments: <Ground|mu|Ground>
        CartesianTransitionMoment: <v=0|a|v=0>
          Axis a
          Strength 0.66
        Symbolic Matrix Elements not available for <v=0|a|v=0>


Residuals before fit for H3N63CuF for the Ground manifold
    J'S'  #'    J"S"  #"     Observed    Calculated      Obs-Calc StdDev 
  1.5 A2  1   1.5 A1  1     8058.2830     8058.2854       -0.0024 1       .00023      0 : qR0(0)1,1.5,1,1.5 : v=0  1  0 A2  1 1.5 - v=0  0  0 A1  1 1.5 : 1d-SF6_2-1-2d-NH3_6bAr_Cu_FT_high_res-1500000 - Overlays :   1:<LineList>
  1.5 A2  1   2.5 A1  1     8058.2830     8058.2845       -0.0015 1       .00069      0 : qR0(0)1,1.5,1,2.5 : v=0  1  0 A2  1 1.5 - v=0  0  0 A1  1 2.5 : 1d-SF6_2-1-2d-NH3_6bAr_Cu_FT_high_res-1500000 - Overlays :   2:<LineList>
  2.5 A2  1   1.5 A1  1     8071.1900     8071.1868        0.0032 1       .00116      0 : qR0(0)1,2.5,1,1.5 : v=0  1  0 A2  1 2.5 - v=0  0  0 A1  1 1.5 : 1d-SF6_2-1-2d-NH3_6bAr_Cu_FT_high_res-1500000 - Overlays :   4:<LineList>
  3.5 A2  1   2.5 A1  1     8071.7630     8071.7651       -0.0021 1       .00188      0 : qR0(0)2,3.5,1,2.5 : v=0  1  0 A2  2 3.5 - v=0  0  0 A1  1 2.5 : 1d-SF6_2-1-2d-NH3_6bAr_Cu_FT_high_res-1500000 - Overlays :   5:<LineList>
  2.5 A2  2   2.5 A1  1     8088.0390     8088.0345        0.0045 1       .00116      0 : qR0(0)2,2.5,1,2.5 : v=0  1  0 A2  2 2.5 - v=0  0  0 A1  1 2.5 : 1d-SF6_2-1-2d-NH3_6bAr_Cu_FT_high_res-1500000 - Overlays :   7:<LineList>
  1.5 A2  3   1.5 A1  1     8088.5990     8088.6004       -0.0014 1       .00053      0 : qR0(0)2,1.5,1,1.5 : v=0  1  0 A2  2 1.5 - v=0  0  0 A1  1 1.5 : 1d-SF6_2-1-2d-NH3_6bAr_Cu_FT_high_res-1500000 - Overlays :   8:<LineList>
  1.5 A2  3   2.5 A1  1     8088.5990     8088.5995       -0.0005 1       .00023      0 : qR0(0)2,1.5,1,2.5 : v=0  1  0 A2  2 1.5 - v=0  0  0 A1  1 2.5 : 1d-SF6_2-1-2d-NH3_6bAr_Cu_FT_high_res-1500000 - Overlays :   9:<LineList>
  1.5 A2  3   0.5 A1  1     8088.5990     8088.5987        0.0003 1       .00018      0 : qR0(0)2,1.5,1,0.5 : v=0  1  0 A2  2 1.5 - v=0  0  0 A1  1 0.5 : 1d-SF6_2-1-2d-NH3_6bAr_Cu_FT_high_res-1500000 - Overlays :  10:<LineList>
  2.5 A1  3   2.5 A2  2    16136.6370    16136.6284        0.0086 1       .00088      0 : qR0(1)3,2.5,2,2.5 : v=0  2  0 A1  3 2.5 - v=0  1  0 A2  2 2.5 : 1d-SF6_2-1-2d-NH3_6bAr_Cu_FT_high_res-1500000 - Overlays :  11:<LineList>
  2.5 A1  4   1.5 A2  3    16147.7080    16147.7087       -0.0007 1       .00138      0 : qR0(1)2,2.5,2,1.5 : v=0  2  0 A1  2 2.5 - v=0  1  0 A2  2 1.5 : 1d-SF6_2-1-2d-NH3_6bAr_Cu_FT_high_res-1500000 - Overlays :  12:<LineList>
  3.5 A1  1   2.5 A2  1    16148.2850    16148.2782        0.0068 1       .00235      0 : qR0(1)2,3.5,1,2.5 : v=0  2  0 A1  2 3.5 - v=0  1  0 A2  1 2.5 : 1d-SF6_2-1-2d-NH3_6bAr_Cu_FT_high_res-1500000 - Overlays :  13:<LineList>
  2.5 A1  2   1.5 A2  2    16148.3750    16148.3946       -0.0196 1       .00171      0 : qR0(1)1,2.5,0,1.5 : v=0  2  0 A1  1 2.5 - v=0  1  0 A2  0 1.5 : 1d-SF6_2-1-2d-NH3_6bAr_Cu_FT_high_res-1500000 - Overlays :  14:<LineList>
  4.5 A1  1   3.5 A2  1    16148.4590    16148.4532        0.0058 1       .00322      0 : qR0(1)3,4.5,2,3.5 : v=0  2  0 A1  3 4.5 - v=0  1  0 A2  2 3.5 : 1d-SF6_2-1-2d-NH3_6bAr_Cu_FT_high_res-1500000 - Overlays :  15:<LineList>
  3.5 A1  2   2.5 A2  2    16148.5560    16148.5493        0.0067 1       .00182      0 : qR0(1)3,3.5,2,2.5 : v=0  2  0 A1  3 3.5 - v=0  1  0 A2  2 2.5 : 1d-SF6_2-1-2d-NH3_6bAr_Cu_FT_high_res-1500000 - Overlays :  16:<LineList>
  1.5 A1  4   0.5 A2  2    16149.1370    16149.1369        0.0001 1       .00079      0 : qR0(1)1,1.5,1,0.5 : v=0  2  0 A1  1 1.5 - v=0  1  0 A2  1 0.5 : 1d-SF6_2-1-2d-NH3_6bAr_Cu_FT_high_res-1500000 - Overlays :  17:<LineList>
  1.5 A1  2   1.5 A2  1    16149.7660    16149.7747       -0.0087 1       .00074      0 : qR0(1)3,1.5,1,1.5 : v=0  2  0 A1  3 1.5 - v=0  1  0 A2  1 1.5 : 1d-SF6_2-1-2d-NH3_6bAr_Cu_FT_high_res-1500000 - Overlays :  18:<LineList>
  3.5 A1  2   3.5 A2  1    16164.8190    16164.8188        0.0002 1       .00069      0 : qR0(1)3,3.5,2,3.5 : v=0  2  0 A1  3 3.5 - v=0  1  0 A2  2 3.5 : 1d-SF6_2-1-2d-NH3_6bAr_Cu_FT_high_res-1500000 - Overlays :  19:<LineList>
  2.5 A1  4   2.5 A2  1    16165.1230    16165.1223        0.0007 1       .00049      0 : qR0(1)2,2.5,1,2.5 : v=0  2  0 A1  2 2.5 - v=0  1  0 A2  1 2.5 : 1d-SF6_2-1-2d-NH3_6bAr_Cu_FT_high_res-1500000 - Overlays :  20:<LineList>

18 Observations,  5 Parameters
Initial Average Error: 0.00735999696793797
Predicted New Error:   0.00735999696787131
Parameters:
  # Old                 New                 Std Dev   Change/Std Sens    Summary              Name
  1 4037.4553844084     4037.45538443331    .00185765    0.0000  4.51e-5 4037.4554(19)        v=0 B
  2 .00120171086885127  .00120171425085868  .00024742    0.0000  6.13e-6 1.20(25)e-3          v=0 DJ
  3 -2.71734443240931   -2.71734443421747   .01506811    0.0000  .001147 -2.717(15)           N eQq
  4 66.1957004803776    66.195700475199     .01195829    0.0000  .000946 66.196(12)           Cu eQq
  5 .0188863185560258   .0188863304044328   .00118821    0.0000  9.39e-5 0.0189(12)           Cu Cperp

Correlation Matrix
       1       2       3       4       5
  1   1.000
  2   0.955   1.000
  3   0.135   0.098   1.000
  4  -0.032  -0.023   0.340   1.000
  5   0.274   0.234  -0.157  -0.014   1.000
