# Supplementary material for: Gas phase complexes of H3N⋯CuF and H3N⋯CuI studied by rotational spectroscopy and ab initio calculations: the effect of X (X = F, Cl, Br, I) in OC⋯CuX and H3N⋯CuX
Source: Royal Society of Chemistry journal article supplement (doi:10.1039/c6cp01368f), 2016-01-01
Supplement: c6cp01368f8.log [file c6cp01368f8.log]

Pgopher 9.0.171 14 Dec 2015 22:26 32 bit (Delphi 18.5/18)
Mixture: H3N63CuI.pgo
  Units               MHz
  PrintLevel          Detail
  Precision           4
  BasisOrder          boDefault
  QuantumNumberFormat J
  FitCycles           1
  FitDetails          False
  AutoReplot          True
  AllowComplex        False
  NoLineList          False
  ShowEstUnc          False
  ShowDerivatives     False
  SVDlimit            5
  ShowSubBasis        False
  AllowZeroI          False
  ScaledParameters    True
  SVDThresh    1E-6
  ScaleChanges 1
  SmallE       5.99584916E-14
  Species: Species
    Jmin 0
    Jmax 60
    Concentration 1
    SymmetricMolecule: H3N63CuI
      nNuclei        3
      Jmax           30
      Colour         Red
      JAdjustSym     False
      BlockMatrix    True
      PointGroup     C3v
      AlternateBasis False
      SymmetryLabels Required
      CompactKLabels False
      wt(A1,A2)      1
      wt(E)          1
      (Wt2)          1
      (Wt3)          1
      (Wt4)          1
      (Wt5)          1
      (Wt6)          1
      (Wt7)          1
      (Wt8)          1
      (Wt9)          1
      (Wt10)         1
      (Wt11)         1
      (Wt12)         1
      (Wt13)         1
      Abundance     1
      AssumedOrigin 1E99
      SymmetricManifold: Ground
        Jmin          0
        Jmax          30
        Initial       True
        EigenSearch   True
        LimitSearch   False
        AutoQConverge True
        UsePopParams  False
        SymmetricTop: v=0
          Symmetry A1
          Kmin     0
          Kmax     1
          B   1162.03613101107           Float
          C   185751
          DJ  0.000128879569079114       Float
          DJK 0.0129573181260375         Float
          <N  ,K  ,l  |B|N,K,l> = N*(N+1)-K^2

          <N  ,K  ,l  |C|N,K,l> = K^2

          <N  ,K  ,l  |DJ|N,K,l> = -N^2*(N+1)^2

          <N  ,K  ,l  |DJK|N,K,l> = -N*(N+1)*K^2

          symmetricTopNucleus: N
            Spin   1
            AsNext False
            MaxDJ  -0.5
            eQq -2.28180138492488          Float
            Matrix elements for eQq not available
          symmetricTopNucleus: Cu
            Spin   1.5
            AsNext False
            MaxDJ  -0.5
            eQq 62.9434820083554           Float
            Matrix elements for eQq not available
          symmetricTopNucleus: I
            Spin   2.5
            AsNext False
            MaxDJ  -0.5
            eQq -613.986164998773          Float
            Matrix elements for eQq not available
      TransitionMoments: <Ground|mu|Ground>
        CartesianTransitionMoment: <v=0|a|v=0>
          Axis a
          Strength 0.66
        Symbolic Matrix Elements not available for <v=0|a|v=0>
  Simulation: Simulation
    Intensity factor:0.333333333333333 (1 from Spol)
    IntensityUnits Normalized
    LifeModel      lmNone
    PlotUnits      MHz
    nDF            2000
    WidthMult      6
    AutoMin        True
    AutoMax        True
    ShowSum        False
    ShowParts      True
    ShowFortrat    False
    UseUpper       False
    ShowSymmetry   True
    ShowDeltaJ     False
    ScaleMarkSize  True
    UseSymmetry    False
    UseStateNumber False
    FortratQno     J
    Fmin        16047.23330287
    Fmax        16480.7306315385
    Ymax        6.85063591554141E-5
    Temperature 30
    Gaussian    0.045
    SMargin     -1
    OThreshold  1E-6
    Tvib        -1
    Tspin       -1
    PlotSplit   0.5
  Fundamental Constants from CODATA 2014: h=6.62607004E-34 k=1.38064852E-23 NA=6.022140857E23 e=1.6021766208E-19 me=9.10938356E-31


Residuals before fit for H3N63CuI for the Ground manifold
    F'S'   #'    F"S"   #"     Observed    Calculated      Obs-Calc StdDev 
    6 A2   7     5 A1   7     6980.1170     6980.1421       -0.0251 1.00000 1.2e-7 0.0000 : qR0(2)3,3.5,6,2,2.5,5 : v=0  3  0 A2  3 3.5  6 - v=0  2  0 A1  2 2.5  5 : 1d-CF3I_3d-H3N_6bAr_Cu-FT-660000-high_res.txt - Overlays   :   1:<LineList>
    5 A2  12     4 A1  11     6980.2500     6980.2526       -0.0026 1.00000 1.0e-7 0.0000 : qR0(2)2,2.5,5,1,1.5,4 : v=0  3  0 A2  2 2.5  5 - v=0  2  0 A1  1 1.5  4 : 1d-CF3I_3d-H3N_6bAr_Cu-FT-660000-high_res.txt - Overlays   :   2:<LineList>
    7 A2   3     6 A1   3     6980.2500     6980.2520       -0.0020 1.00000 1.4e-7 0.0000 : qR0(2)4,4.5,7,3,3.5,6 : v=0  3  0 A2  4 4.5  7 - v=0  2  0 A1  3 3.5  6 : 1d-CF3I_3d-H3N_6bAr_Cu-FT-660000-high_res.txt - Overlays   :   3:<LineList>
    5 A2  11     4 A1  10     6980.3250     6980.2896        0.0354 1.00000 1e-7 0.0000 : qR0(2)3,2.5,5,2,1.5,4 : v=0  3  0 A2  3 2.5  5 - v=0  2  0 A1  2 1.5  4 : 1d-CF3I_3d-H3N_6bAr_Cu-FT-660000-high_res.txt - Overlays     :   4:<LineList>
    6 A2   6     5 A1   6     6980.4000     6980.3980        0.0020 1.00000 1.2e-7 0.0000 : qR0(2)4,3.5,6,3,2.5,5 : v=0  3  0 A2  4 3.5  6 - v=0  2  0 A1  3 2.5  5 : 1d-CF3I_3d-H3N_6bAr_Cu-FT-660000-high_res.txt - Overlays   :   5:<LineList>
    4 A2  16     3 A1  13     6980.4000     6980.3935        0.0065 1.00000 8.0e-8 0.0000 : qR0(2)3,3.5,4,1,1.5,3 : v=0  3  0 A2  3 3.5  4 - v=0  2  0 A1  1 1.5  3 : 1d-CF3I_3d-H3N_6bAr_Cu-FT-660000-high_res.txt - Overlays   :   6:<LineList>
    6 E   20     5 E   19    11614.8010    11614.8003        0.0007 1.00000 3.3e-7 0.0000 : qR1(4)4,5.5,6,3,4.5,5 : v=0  5  1 E  4 5.5  6 - v=0  4  1 E  3 4.5  5 : 1d-CF3I_3d-H3N_6bAr_Cu-FT-660000-high_res.txt - Overlays     :   7:<LineList>
    8 E    5     7 E    5    11614.8010    11614.7959        0.0051 1.00000 4.4e-7 0.0000 : qR1(4)6,7.5,8,5,6.5,7 : v=0  5  1 E  6 7.5  8 - v=0  4  1 E  5 6.5  7 : 1d-CF3I_3d-H3N_6bAr_Cu-FT-660000-high_res.txt - Overlays     :   8:<LineList>
    7 A2   4     6 A1   4    11618.0830    11618.0851       -0.0021 1.00000 3.9e-7 0.0000 : qR0(4)5,6.5,7,4,5.5,6 : v=0  5  0 A2  5 6.5  7 - v=0  4  0 A1  4 5.5  6 : 1d-CF3I_3d-H3N_6bAr_Cu-FT-660000-high_res.txt - Overlays   :   9:<LineList>
    6 A2   8     5 A1   8    11618.1770    11618.1749        0.0021 1.00000 3.4e-7 0.0000 : qR0(4)4,5.5,6,3,4.5,5 : v=0  5  0 A2  4 5.5  6 - v=0  4  0 A1  3 4.5  5 : 1d-CF3I_3d-H3N_6bAr_Cu-FT-660000-high_res.txt - Overlays   :  10:<LineList>
    8 A2   2     7 A1   2    11618.1770    11618.1742        0.0028 1.00000 4.5e-7 0.0000 : qR0(4)6,7.5,8,5,6.5,7 : v=0  5  0 A2  6 7.5  8 - v=0  4  0 A1  5 6.5  7 : 1d-CF3I_3d-H3N_6bAr_Cu-FT-660000-high_res.txt - Overlays   :  11:<LineList>
    8 E    6     7 E    6    11621.7390    11621.7389        0.0001 1.00000 4.5e-7 0.0000 : qR1(4)5,6.5,8,4,5.5,7 : v=0  5  1 E  5 6.5  8 - v=0  4  1 E  4 5.5  7 : 1d-CF3I_3d-H3N_6bAr_Cu-FT-660000-high_res.txt - Overlays     :  12:<LineList>
    9 E    2     8 E    2    11621.8300    11621.8396       -0.0096 1.00000 5.1e-7 0.0000 : qR1(4)6,7.5,9,5,6.5,8 : v=0  5  1 E  6 7.5  9 - v=0  4  1 E  5 6.5  8 : 1d-CF3I_3d-H3N_6bAr_Cu-FT-660000-high_res.txt - Overlays     :  13:<LineList>
    7 E   13     6 E   13    11621.8300    11621.8417       -0.0117 1.00000 4.0e-7 0.0000 : qR1(4)4,5.5,7,3,4.5,6 : v=0  5  1 E  4 5.5  7 - v=0  4  1 E  3 4.5  6 : 1d-CF3I_3d-H3N_6bAr_Cu-FT-660000-high_res.txt - Overlays     :  14:<LineList>
    5 A2  14     4 A1  13    11622.1500    11622.1665       -0.0165 1.00000 2.3e-7 0.0000 : qR0(4)5,3.5,5,4,2.5,4 : v=0  5  0 A2  5 3.5  5 - v=0  4  0 A1  4 2.5  4 : 1d-CF3I_3d-H3N_6bAr_Cu-FT-660000-high_res.txt - Overlays   :  15:<LineList>
    4 A2  19     3 A1  16    11622.3500    11622.3479        0.0021 1.00000 1.8e-7 0.0000 : qR0(4)4,2.5,4,3,1.5,3 : v=0  5  0 A2  4 2.5  4 - v=0  4  0 A1  3 1.5  3 : 1d-CF3I_3d-H3N_6bAr_Cu-FT-660000-high_res.txt - Overlays   :  16:<LineList>
    6 A2   9     5 A1   9    11622.3500    11622.3437        0.0063 1.00000 2.8e-7 0.0000 : qR0(4)6,4.5,6,5,3.5,5 : v=0  5  0 A2  6 4.5  6 - v=0  4  0 A1  5 3.5  5 : 1d-CF3I_3d-H3N_6bAr_Cu-FT-660000-high_res.txt - Overlays   :  17:<LineList>
    9 A2   3     8 A1   3    11623.6640    11623.6647       -0.0007 1.00000 5.6e-7 0.0000 : qR0(4)6,6.5,9,5,5.5,8 : v=0  5  0 A2  6 6.5  9 - v=0  4  0 A1  5 5.5  8 : 1d-CF3I_3d-H3N_6bAr_Cu-FT-660000-high_res.txt - Overlays   :  18:<LineList>
    7 A2  12     6 A1  12    11623.6640    11623.6578        0.0062 1.00000 4.3e-7 0.0000 : qR0(4)4,4.5,7,3,3.5,6 : v=0  5  0 A2  4 4.5  7 - v=0  4  0 A1  3 3.5  6 : 1d-CF3I_3d-H3N_6bAr_Cu-FT-660000-high_res.txt - Overlays   :  19:<LineList>
    8 A2   6     7 A1   6    11623.9950    11623.9992       -0.0042 1.00000 4.9e-7 0.0000 : qR0(4)6,5.5,8,5,4.5,7 : v=0  5  0 A2  6 5.5  8 - v=0  4  0 A1  5 4.5  7 : 1d-CF3I_3d-H3N_6bAr_Cu-FT-660000-high_res.txt - Overlays   :  20:<LineList>
    6 A2  18     5 A1  18    11623.9950    11623.9897        0.0053 1.00000 3.7e-7 0.0000 : qR0(4)4,3.5,6,3,2.5,5 : v=0  5  0 A2  4 3.5  6 - v=0  4  0 A1  3 2.5  5 : 1d-CF3I_3d-H3N_6bAr_Cu-FT-660000-high_res.txt - Overlays   :  21:<LineList>
    8 A2  16     7 A1  16    16261.7690    16261.7648        0.0042 1.00000 3.6e-7 0.0000 : qR0(6)8,9.5,8,7,8.5,7 : v=0  7  0 A2  8 9.5  8 - v=0  6  0 A1  7 8.5  7 : 1d-CF3I_3d-H3N_6bAr_Cu-FT-660000-high_res.txt - Overlays   :  22:<LineList>
    6 A2  25     5 A1  25    16261.7690    16261.7655        0.0035 1.00000 2.7e-7 0.0000 : qR0(6)6,7.5,6,5,6.5,5 : v=0  7  0 A2  6 7.5  6 - v=0  6  0 A1  5 6.5  5 : 1d-CF3I_3d-H3N_6bAr_Cu-FT-660000-high_res.txt - Overlays   :  23:<LineList>
    6 E   49     5 E   48    16262.2590    16262.2649       -0.0059 1.00000 2.0e-7 0.0000 : qR1(6)6,7.5,6,5,6.5,5 : v=0  7  1 E  6 7.5  6 - v=0  6  1 E  5 6.5  5 : 1d-CF3I_3d-H3N_6bAr_Cu-FT-660000-high_res.txt - Overlays     :  24:<LineList>
    3 A2  30     2 A1  24    16262.2590    16262.2422        0.0168 1.00000 1.3e-7 0.0000 : qR0(6)6,4.5,3,5,3.5,2 : v=0  7  0 A2  6 4.5  3 - v=0  6  0 A1  5 3.5  2 : 1d-CF3I_3d-H3N_6bAr_Cu-FT-660000-high_res.txt - Overlays   :  25:<LineList>
    5 A2  28     4 A1  27    16262.2590    16262.2561        0.0029 1.00000 2.2e-7 0.0000 : qR0(6)8,6.5,5,7,5.5,4 : v=0  7  0 A2  8 6.5  5 - v=0  6  0 A1  7 5.5  4 : 1d-CF3I_3d-H3N_6bAr_Cu-FT-660000-high_res.txt - Overlays   :  26:<LineList>
    8 E   28     7 E   28    16262.2590    16262.2628       -0.0038 1.00000 2.6e-7 0.0000 : qR1(6)8,9.5,8,7,8.5,7 : v=0  7  1 E  8 9.5  8 - v=0  6  1 E  7 8.5  7 : 1d-CF3I_3d-H3N_6bAr_Cu-FT-660000-high_res.txt - Overlays     :  27:<LineList>
    4 E   60     3 E   53    16262.5280    16262.5411       -0.0131 1.00000 1.2e-7 0.0000 : qR1(6)7,5.5,4,6,4.5,3 : v=0  7  1 E  7 5.5  4 - v=0  6  1 E  6 4.5  3 : 1d-CF3I_3d-H3N_6bAr_Cu-FT-660000-high_res.txt - Overlays     :  28:<LineList>
    3 E   58     2 E   46    16262.6340    16262.6364       -0.0024 1.00000 9.3e-8 0.0000 : qR1(6)6,4.5,3,5,3.5,2 : v=0  7  1 E  6 4.5  3 - v=0  6  1 E  5 3.5  2 : 1d-CF3I_3d-H3N_6bAr_Cu-FT-660000-high_res.txt - Overlays     :  30:<LineList>
    5 E   56     4 E   53    16262.6340    16262.6468       -0.0128 1.00000 1.6e-7 0.0000 : qR1(6)8,6.5,5,7,5.5,4 : v=0  7  1 E  8 6.5  5 - v=0  6  1 E  7 5.5  4 : 1d-CF3I_3d-H3N_6bAr_Cu-FT-660000-high_res.txt - Overlays     :  31:<LineList>
    8 A2  13     7 A1  15    16264.9330    16264.9363       -0.0033 1.00000 3.6e-7 0.0000 : qR0(6)8,8.5,8,7,7.5,7 : v=0  7  0 A2  8 8.5  8 - v=0  6  0 A1  7 7.5  7 : 1d-CF3I_3d-H3N_6bAr_Cu-FT-660000-high_res.txt - Overlays   :  32:<LineList>
    5 A2  27     4 A1  26    16264.9330    16264.9322        0.0008 1.00000 2.2e-7 0.0000 : qR0(6)6,5.5,5,5,4.5,4 : v=0  7  0 A2  6 5.5  5 - v=0  6  0 A1  5 4.5  4 : 1d-CF3I_3d-H3N_6bAr_Cu-FT-660000-high_res.txt - Overlays   :  33:<LineList>
    7 A2  18     6 A1  19    16264.9330    16264.9348       -0.0018 1.00000 3.1e-7 0.0000 : qR0(6)8,7.5,7,7,6.5,6 : v=0  7  0 A2  8 7.5  7 - v=0  6  0 A1  7 6.5  6 : 1d-CF3I_3d-H3N_6bAr_Cu-FT-660000-high_res.txt - Overlays   :  34:<LineList>
    6 A2  24     5 A1  24    16264.9330    16264.9378       -0.0048 1.00000 2.7e-7 0.0000 : qR0(6)6,6.5,6,5,5.5,5 : v=0  7  0 A2  6 6.5  6 - v=0  6  0 A1  5 5.5  5 : 1d-CF3I_3d-H3N_6bAr_Cu-FT-660000-high_res.txt - Overlays   :  35:<LineList>
    5 A2  33     4 A1  32    16265.1370    16265.1341        0.0029 1.00000 2.2e-7 0.0000 : qR0(6)7,7.5,5,6,6.5,4 : v=0  7  0 A2  7 7.5  5 - v=0  6  0 A1  6 6.5  4 : 1d-CF3I_3d-H3N_6bAr_Cu-FT-660000-high_res.txt - Overlays   :  37:<LineList>
    4 A2  34     3 A1  31    16265.2360    16265.2254        0.0106 1.00000 1.7e-7 0.0000 : qR0(6)6,6.5,4,5,5.5,3 : v=0  7  0 A2  6 6.5  4 - v=0  6  0 A1  5 5.5  3 : 1d-CF3I_3d-H3N_6bAr_Cu-FT-660000-high_res.txt - Overlays   :  38:<LineList>
    6 A2  29     5 A1  29    16265.2360    16265.2329        0.0031 1.00000 2.7e-7 0.0000 : qR0(6)8,8.5,6,7,7.5,5 : v=0  7  0 A2  8 8.5  6 - v=0  6  0 A1  7 7.5  5 : 1d-CF3I_3d-H3N_6bAr_Cu-FT-660000-high_res.txt - Overlays   :  39:<LineList>
    6 E   43     5 E   42    16266.5000    16266.4829        0.0171 1.00000 4.5e-7 0.0000 : qR1(6)7,5.5,6,6,4.5,5 : v=0  7  1 E  7 5.5  6 - v=0  6  1 E  6 4.5  5 : 1d-CF3I_3d-H3N_6bAr_Cu-FT-660000-high_res.txt - Overlays     :  40:<LineList>
   10 E    5     9 E    5    16266.5000    16266.4957        0.0043 1.00000 8.0e-7 0.0000 : qR1(6)8,9.5,10,7,8.5,9 : v=0  7  1 E  8 9.5 10 - v=0  6  1 E  7 8.5  9 : 1d-CF3I_3d-H3N_6bAr_Cu-FT-660000-high_res.txt - Overlays    :  41:<LineList>
    8 E   20     7 E   20    16266.5000    16266.4941        0.0059 1.00000 6.4e-7 0.0000 : qR1(6)6,7.5,8,5,6.5,7 : v=0  7  1 E  6 7.5  8 - v=0  6  1 E  5 6.5  7 : 1d-CF3I_3d-H3N_6bAr_Cu-FT-660000-high_res.txt - Overlays     :  42:<LineList>
    4 E   64     3 E   57    16267.0900    16267.0957       -0.0057 1.00000 3.0e-7 0.0000 : qR1(6)6,6.5,4,5,5.5,3 : v=0  7  1 E  6 6.5  4 - v=0  6  1 E  5 5.5  3 : 1d-CF3I_3d-H3N_6bAr_Cu-FT-660000-high_res.txt - Overlays     :  43:<LineList>
    6 E   53     5 E   52    16267.0900    16267.1002       -0.0102 1.00000 4.6e-7 0.0000 : qR1(6)8,8.5,6,7,7.5,5 : v=0  7  1 E  8 8.5  6 - v=0  6  1 E  7 7.5  5 : 1d-CF3I_3d-H3N_6bAr_Cu-FT-660000-high_res.txt - Overlays     :  44:<LineList>
    7 E   33     6 E   33    16267.3910    16267.3705        0.0205 1.00000 5.5e-7 0.0000 : qR1(6)6,6.5,7,5,5.5,6 : v=0  7  1 E  6 6.5  7 - v=0  6  1 E  5 5.5  6 : 1d-CF3I_3d-H3N_6bAr_Cu-FT-660000-high_res.txt - Overlays     :  45:<LineList>
    9 E   12     8 E   12    16267.3910    16267.3708        0.0202 1.00000 7.1e-7 0.0000 : qR1(6)8,8.5,9,7,7.5,8 : v=0  7  1 E  8 8.5  9 - v=0  6  1 E  7 7.5  8 : 1d-CF3I_3d-H3N_6bAr_Cu-FT-660000-high_res.txt - Overlays     :  46:<LineList>
    6 E   44     5 E   43    16268.1470    16268.1593       -0.0123 1.00000 4.4e-7 0.0000 : qR1(6)6,5.5,6,5,3.5,5 : v=0  7  1 E  6 5.5  6 - v=0  6  1 E  5 3.5  5 : 1d-CF3I_3d-H3N_6bAr_Cu-FT-660000-high_res.txt - Overlays     :  47:<LineList>
    8 E   21     7 E   21    16268.1470    16268.1562       -0.0092 1.00000 5.9e-7 0.0000 : qR1(6)8,7.5,8,7,6.5,7 : v=0  7  1 E  8 7.5  8 - v=0  6  1 E  7 6.5  7 : 1d-CF3I_3d-H3N_6bAr_Cu-FT-660000-high_res.txt - Overlays     :  48:<LineList>
    7 A2  14     6 A1  14    16269.4990    16269.4878        0.0112 1.00000 3.0e-7 0.0000 : qR0(6)7,6.5,7,6,5.5,6 : v=0  7  0 A2  7 6.5  7 - v=0  6  0 A1  6 5.5  6 : 1d-CF3I_3d-H3N_6bAr_Cu-FT-660000-high_res.txt - Overlays   :  49:<LineList>
    8 E   24     7 E   23    16269.5850    16269.6077       -0.0227 1.00000 2.8e-7 0.0000 : qR1(6)8,6.5,8,7,5.5,7 : v=0  7  1 E  8 6.5  8 - v=0  6  1 E  7 5.5  7 : 1d-CF3I_3d-H3N_6bAr_Cu-FT-660000-high_res.txt - Overlays     :  50:<LineList>
    8 A2   9     7 A1   9    16269.5850    16269.5763        0.0087 1.00000 3.5e-7 0.0000 : qR0(6)8,7.5,8,7,6.5,7 : v=0  7  0 A2  8 7.5  8 - v=0  6  0 A1  7 6.5  7 : 1d-CF3I_3d-H3N_6bAr_Cu-FT-660000-high_res.txt - Overlays   :  51:<LineList>
    6 A2  20     5 A1  20    16269.5850    16269.5780        0.0070 1.00000 2.6e-7 0.0000 : qR0(6)6,5.5,6,5,3.5,5 : v=0  7  0 A2  6 5.5  6 - v=0  6  0 A1  5 3.5  5 : 1d-CF3I_3d-H3N_6bAr_Cu-FT-660000-high_res.txt - Overlays   :  52:<LineList>
    6 E   46     5 E   44    16269.5850    16269.5980       -0.0130 1.00000 2.1e-7 0.0000 : qR1(6)6,4.5,6,5,4.5,5 : v=0  7  1 E  6 4.5  6 - v=0  6  1 E  5 4.5  5 : 1d-CF3I_3d-H3N_6bAr_Cu-FT-660000-high_res.txt - Overlays     :  53:<LineList>
   12 A2   1    11 A1   1    16269.9800    16269.9876       -0.0076 1.00000 1.0e-6 0.0000 : qR0(6)8,9.5,12,7,8.5,11 : v=0  7  0 A2  8 9.5 12 - v=0  6  0 A1  7 8.5 11 : 1d-CF3I_3d-H3N_6bAr_Cu-FT-660000-high_res.txt - Overlays :  54:<LineList>
   10 A2   5     9 A1   5    16269.9800    16269.9822       -0.0022 1.00000 8.6e-7 0.0000 : qR0(6)6,7.5,10,5,6.5,9 : v=0  7  0 A2  6 7.5 10 - v=0  6  0 A1  5 6.5  9 : 1d-CF3I_3d-H3N_6bAr_Cu-FT-660000-high_res.txt - Overlays  :  55:<LineList>
   11 A2   2    10 A1   2    16269.9800    16269.9718        0.0082 1.00000 9.5e-7 0.0000 : qR0(6)7,8.5,11,6,7.5,10 : v=0  7  0 A2  7 8.5 11 - v=0  6  0 A1  6 7.5 10 : 1d-CF3I_3d-H3N_6bAr_Cu-FT-660000-high_res.txt - Overlays :  56:<LineList>
    9 E   14     8 E   13    16270.0640    16270.0478        0.0162 1.00000 3.1e-7 0.0000 : qR1(6)6,7.5,9,5,6.5,8 : v=0  7  1 E  6 7.5  9 - v=0  6  1 E  5 6.5  8 : 1d-CF3I_3d-H3N_6bAr_Cu-FT-660000-high_res.txt - Overlays     :  57:<LineList>
   11 E    2    10 E    2    16270.0640    16270.0419        0.0221 1.00000 3.8e-7 0.0000 : qR1(6)8,9.5,11,7,8.5,10 : v=0  7  1 E  8 9.5 11 - v=0  6  1 E  7 8.5 10 : 1d-CF3I_3d-H3N_6bAr_Cu-FT-660000-high_res.txt - Overlays   :  58:<LineList>
    9 A2  10     8 A1  10    16270.1470    16270.1729       -0.0259 1.00000 4.4e-7 0.0000 : qR0(6)8,6.5,9,7,5.5,8 : v=0  7  0 A2  8 6.5  9 - v=0  6  0 A1  7 5.5  8 : 1d-CF3I_3d-H3N_6bAr_Cu-FT-660000-high_res.txt - Overlays   :  59:<LineList>
   11 A2   3    10 A1   3    16270.1470    16270.1636       -0.0166 1.00000 5.4e-7 0.0000 : qR0(6)8,8.5,11,7,7.5,10 : v=0  7  0 A2  8 8.5 11 - v=0  6  0 A1  7 7.5 10 : 1d-CF3I_3d-H3N_6bAr_Cu-FT-660000-high_res.txt - Overlays :  60:<LineList>
    7 A2  23     6 A1  23    16270.1470    16270.1615       -0.0145 1.00000 3.4e-7 0.0000 : qR0(6)6,4.5,7,5,3.5,6 : v=0  7  0 A2  6 4.5  7 - v=0  6  0 A1  5 3.5  6 : 1d-CF3I_3d-H3N_6bAr_Cu-FT-660000-high_res.txt - Overlays   :  61:<LineList>
    8 A2  17     7 A1  17    16270.1470    16270.1544       -0.0074 1.00000 3.9e-7 0.0000 : qR0(6)7,5.5,8,6,4.5,7 : v=0  7  0 A2  7 5.5  8 - v=0  6  0 A1  6 4.5  7 : 1d-CF3I_3d-H3N_6bAr_Cu-FT-660000-high_res.txt - Overlays   :  62:<LineList>
    9 A2  12     8 A1  12    16270.1470    16270.1572       -0.0102 1.00000 4.4e-7 0.0000 : qR0(6)6,6.5,9,5,5.5,8 : v=0  7  0 A2  6 6.5  9 - v=0  6  0 A1  5 5.5  8 : 1d-CF3I_3d-H3N_6bAr_Cu-FT-660000-high_res.txt - Overlays   :  63:<LineList>
    8 A2  18     7 A1  18    16270.3980    16270.3980       -0.0000 1.00000 3.9e-7 0.0000 : qR0(6)6,5.5,8,5,4.5,7 : v=0  7  0 A2  6 5.5  8 - v=0  6  0 A1  5 4.5  7 : 1d-CF3I_3d-H3N_6bAr_Cu-FT-660000-high_res.txt - Overlays   :  64:<LineList>
   10 A2   6     9 A1   6    16270.3980    16270.4057       -0.0077 1.00000 4.9e-7 0.0000 : qR0(6)8,7.5,10,7,6.5,9 : v=0  7  0 A2  8 7.5 10 - v=0  6  0 A1  7 6.5  9 : 1d-CF3I_3d-H3N_6bAr_Cu-FT-660000-high_res.txt - Overlays  :  65:<LineList>
    9 A2  11     8 A1  11    16270.3980    16270.3829        0.0151 1.00000 4.4e-7 0.0000 : qR0(6)7,6.5,9,6,5.5,8 : v=0  7  0 A2  7 6.5  9 - v=0  6  0 A1  6 5.5  8 : 1d-CF3I_3d-H3N_6bAr_Cu-FT-660000-high_res.txt - Overlays   :  66:<LineList>
    9 E   15     8 E   15    16270.5130    16270.5358       -0.0228 1.00000 2.8e-7 0.0000 : qR1(6)8,7.5,9,7,6.5,8 : v=0  7  1 E  8 7.5  9 - v=0  6  1 E  7 6.5  8 : 1d-CF3I_3d-H3N_6bAr_Cu-FT-660000-high_res.txt - Overlays     :  67:<LineList>
    7 E   38     6 E   36    16270.5130    16270.5384       -0.0254 1.00000 2.2e-7 0.0000 : qR1(6)6,5.5,7,5,4.5,6 : v=0  7  1 E  6 5.5  7 - v=0  6  1 E  5 4.5  6 : 1d-CF3I_3d-H3N_6bAr_Cu-FT-660000-high_res.txt - Overlays     :  68:<LineList>
   12 E    1    11 E    1    16270.7300    16270.7202        0.0098 1.00000 4.3e-7 0.0000 : qR1(6)8,9.5,12,7,8.5,11 : v=0  7  1 E  8 9.5 12 - v=0  6  1 E  7 8.5 11 : 1d-CF3I_3d-H3N_6bAr_Cu-FT-660000-high_res.txt - Overlays   :  69:<LineList>
   11 E    3    10 E    3    16270.7300    16270.6917        0.0383 1.00000 4.0e-7 0.0000 : qR1(6)7,8.5,11,6,7.5,10 : v=0  7  1 E  7 8.5 11 - v=0  6  1 E  6 7.5 10 : 1d-CF3I_3d-H3N_6bAr_Cu-FT-660000-high_res.txt - Overlays   :  70:<LineList>
   10 E    8     9 E    8    16270.7300    16270.7164        0.0136 1.00000 3.6e-7 0.0000 : qR1(6)6,7.5,10,5,6.5,9 : v=0  7  1 E  6 7.5 10 - v=0  6  1 E  5 6.5  9 : 1d-CF3I_3d-H3N_6bAr_Cu-FT-660000-high_res.txt - Overlays    :  71:<LineList>
   10 E    7     9 E    7    16270.7300    16270.7279        0.0021 1.00000 3.4e-7 0.0000 : qR1(6)8,8.5,10,7,7.5,9 : v=0  7  1 E  8 8.5 10 - v=0  6  1 E  7 7.5  9 : 1d-CF3I_3d-H3N_6bAr_Cu-FT-660000-high_res.txt - Overlays    :  72:<LineList>
    8 E   27     7 E   26    16270.7300    16270.7298        0.0002 1.00000 2.7e-7 0.0000 : qR1(6)6,6.5,8,5,5.5,7 : v=0  7  1 E  6 6.5  8 - v=0  6  1 E  5 5.5  7 : 1d-CF3I_3d-H3N_6bAr_Cu-FT-660000-high_res.txt - Overlays     :  73:<LineList>

SVD fit: 71 Observations,  6 Parameters (scaled)
Initial Average Error: 0.0132282830535847
Predicted New Error:   0.0132282830532713
Parameters:
  # Old                 New                 Std Dev   Change/Std Sens    Summary              Name
  1 1162.03613101107    1162.03613098095    .00067302    0.0000  1.73e-5 1162.03613(67)       v=0 B
  2 .000128879569079114 .000128879218763040 7.3114e-6    0.0000  1.88e-7 1.289(73)e-4         v=0 DJ
  3 .0129573181260375   .0129573229083435   .00026146    0.0000  2.53e-5 0.01296(26)          v=0 DJK
  4 -2.28180138492488   -2.28180416966599   .10548684    0.0000  .014075 -2.28(11)            N eQq
  5 62.9434820083554    62.9434829154886    .09530774    0.0000  .012130 62.943(95)           Cu eQq
  6 -613.986164998773   -613.986170824577   .28121361    0.0000  .035910 -613.99(28)          I eQq

Correlation Matrix
Determinant = 0.023, Largest off-diagonal element = 0.964 at 2,1 = v=0 DJ, v=0 B
       1       2       3       4       5       6
  1   1.000
  2   0.964   1.000
  3   0.091  -0.098   1.000
  4   0.053   0.021  -0.082   1.000
  5  -0.314  -0.237  -0.258  -0.128   1.000
  6   0.370   0.391  -0.025   0.113  -0.144   1.000
