# Supplementary material for: Gas phase complexes of H3N⋯CuF and H3N⋯CuI studied by rotational spectroscopy and ab initio calculations: the effect of X (X = F, Cl, Br, I) in OC⋯CuX and H3N⋯CuX
Source: Royal Society of Chemistry journal article supplement (doi:10.1039/c6cp01368f), 2016-01-01
Supplement: c6cp01368f10.log [file c6cp01368f10.log]

Pgopher 9.0.171 14 Dec 2015 22:26 32 bit (Delphi 18.5/18)
Mixture: H3N65CuI.pgo
  Units               MHz
  PrintLevel          Detail
  Precision           4
  BasisOrder          boDefault
  QuantumNumberFormat J
  FitCycles           1
  FitDetails          False
  AutoReplot          True
  AllowComplex        False
  NoLineList          False
  ShowEstUnc          False
  ShowDerivatives     False
  SVDlimit            5
  ShowSubBasis        False
  AllowZeroI          False
  ScaledParameters    True
  SVDThresh    1E-6
  ScaleChanges 1
  SmallE       5.99584916E-14
  Species: Species
    Jmin 0
    Jmax 60
    Concentration 1
    SymmetricMolecule: H3N65CuI
      nNuclei        3
      Jmax           30
      Colour         Red
      JAdjustSym     False
      BlockMatrix    True
      PointGroup     C3v
      AlternateBasis False
      SymmetryLabels Required
      CompactKLabels False
      wt(A1,A2)      1
      wt(E)          1
      (Wt2)          1
      (Wt3)          1
      (Wt4)          1
      (Wt5)          1
      (Wt6)          1
      (Wt7)          1
      (Wt8)          1
      (Wt9)          1
      (Wt10)         1
      (Wt11)         1
      (Wt12)         1
      (Wt13)         1
      Abundance     1
      AssumedOrigin 1E99
      SymmetricManifold: Ground
        Jmin          0
        Jmax          30
        Initial       True
        EigenSearch   True
        LimitSearch   False
        AutoQConverge True
        UsePopParams  False
        SymmetricTop: v=0
          Symmetry A1
          Kmin     0
          Kmax     1
          B   1153.45325515486           Float
          C   185751
          DJ  9.74123370533582E-5        Float
          DJK 0.00972659395230637        Float
          <N  ,K  ,l  |B|N,K,l> = N*(N+1)-K^2

          <N  ,K  ,l  |C|N,K,l> = K^2

          <N  ,K  ,l  |DJ|N,K,l> = -N^2*(N+1)^2

          <N  ,K  ,l  |DJK|N,K,l> = -N*(N+1)*K^2

          symmetricTopNucleus: N
            Spin   1
            AsNext False
            MaxDJ  -0.5
            eQq -2.17694214445442          Float
            Matrix elements for eQq not available
          symmetricTopNucleus: Cu
            Spin   1.5
            AsNext False
            MaxDJ  -0.5
            eQq 58.6964681690804           Float
            Matrix elements for eQq not available
          symmetricTopNucleus: I
            Spin   2.5
            AsNext False
            MaxDJ  -0.5
            eQq -613.62462014675           Float
            Matrix elements for eQq not available
      TransitionMoments: <Ground|mu|Ground>
        CartesianTransitionMoment: <v=0|a|v=0>
          Axis a
          Strength 0.66
        Symbolic Matrix Elements not available for <v=0|a|v=0>
  Simulation: Simulation
    Intensity factor:0.333333333333333 (1 from Spol)
    IntensityUnits Normalized
    LifeModel      lmNone
    PlotUnits      MHz
    nDF            2000
    WidthMult      6
    AutoMin        True
    AutoMax        True
    ShowSum        False
    ShowParts      True
    ShowFortrat    False
    UseUpper       False
    ShowSymmetry   True
    ShowDeltaJ     False
    ScaleMarkSize  True
    UseSymmetry    False
    UseStateNumber False
    FortratQno     J
    Fmin        16124.6700837918
    Fmax        16176.8620549783
    Ymax        6.66833938109967E-5
    Temperature 30
    Gaussian    0.03
    SMargin     -1
    OThreshold  1E-6
    Tvib        -1
    Tspin       -1
    PlotSplit   0.5
  Fundamental Constants from CODATA 2014: h=6.62607004E-34 k=1.38064852E-23 NA=6.022140857E23 e=1.6021766208E-19 me=9.10938356E-31


Residuals before fit for H3N65CuI for the Ground manifold
    F'S'   #'    F"S"   #"     Observed    Calculated      Obs-Calc StdDev 
    6 A1  19     5 A2  19    13836.1690    13836.1670        0.0020 1.00000 2.2e-7 0.0000 : qR0(5)7,6.5,6,6,5.5,5 : v=0  6  0 A1  7 6.5  6 - v=0  5  0 A2  6 5.5  5 : 1d-CF3I_3d-H3N_6bAr_Cu-FT-660000-high_res.txt - Overlays     :   1:<LineList>
    4 A1  26     3 A2  23    13836.1690    13836.1711       -0.0021 1.00000 1.4e-7 0.0000 : qR0(5)5,4.5,4,4,3.5,3 : v=0  6  0 A1  5 4.5  4 - v=0  5  0 A2  4 3.5  3 : 1d-CF3I_3d-H3N_6bAr_Cu-FT-660000-high_res.txt - Overlays     :   2:<LineList>
    6 A1  20     5 A2  20    13836.1690    13836.1780       -0.0090 1.00000 2.2e-7 0.0000 : qR0(5)6,6.5,6,5,5.5,5 : v=0  6  0 A1  6 6.5  6 - v=0  5  0 A2  5 5.5  5 : 1d-CF3I_3d-H3N_6bAr_Cu-FT-660000-high_res.txt - Overlays     :   3:<LineList>
    7 A1  15     6 A2  15    13836.2650    13836.2747       -0.0097 1.00000 2.6e-7 0.0000 : qR0(5)7,7.5,7,6,6.5,6 : v=0  6  0 A1  7 7.5  7 - v=0  5  0 A2  6 6.5  6 : 1d-CF3I_3d-H3N_6bAr_Cu-FT-660000-high_res.txt - Overlays     :   4:<LineList>
    5 A1  24     4 A2  23    13836.2650    13836.2750       -0.0100 1.00000 1.8e-7 0.0000 : qR0(5)5,5.5,5,4,4.5,4 : v=0  6  0 A1  5 5.5  5 - v=0  5  0 A2  4 4.5  4 : 1d-CF3I_3d-H3N_6bAr_Cu-FT-660000-high_res.txt - Overlays     :   5:<LineList>
    7 E   20     6 E   20    13838.3740    13838.3610        0.0130 1.00000 2.0e-7 0.0000 : qR1(5)5,6.5,7,4,5.5,6 : v=0  6  1 E  5 6.5  7 - v=0  5  1 E  4 5.5  6 : 1d-CF3I_3d-H3N_6bAr_Cu-FT-660000-high_res.txt - Overlays       :   6:<LineList>
    9 E    5     8 E    5    13838.3740    13838.3603        0.0137 1.00000 2.6e-7 0.0000 : qR1(5)7,8.5,9,6,7.5,8 : v=0  6  1 E  7 8.5  9 - v=0  5  1 E  6 7.5  8 : 1d-CF3I_3d-H3N_6bAr_Cu-FT-660000-high_res.txt - Overlays       :   7:<LineList>
    4 A1  31     3 A2  28    13838.3740    13838.3118        0.0622 1.00000 1.3e-7 0.0000 : qR0(5)7,6.5,4,6,5.5,3 : v=0  6  0 A1  7 6.5  4 - v=0  5  0 A2  6 5.5  3 : 1d-CF3I_3d-H3N_6bAr_Cu-FT-660000-high_res.txt - Overlays     :   8:<LineList>
    6 A2  25     5 A1  25    16141.7040    16141.7070       -0.0030 1.00000 2.7e-7 0.0000 : qR0(6)6,7.5,6,5,6.5,5 : v=0  7  0 A2  6 7.5  6 - v=0  6  0 A1  5 6.5  5 : 1d-CF3I_3d-H3N_6bAr_Cu-FT-660000-high_res.txt - Overlays     :  10:<LineList>
    8 A2  16     7 A1  16    16141.7040    16141.7065       -0.0025 1.00000 3.6e-7 0.0000 : qR0(6)8,9.5,8,7,8.5,7 : v=0  7  0 A2  8 9.5  8 - v=0  6  0 A1  7 8.5  7 : 1d-CF3I_3d-H3N_6bAr_Cu-FT-660000-high_res.txt - Overlays     :  11:<LineList>
    6 A2  24     5 A1  24    16144.7620    16144.7777       -0.0157 1.00000 2.6e-7 0.0000 : qR0(6)6,6.5,6,5,5.5,5 : v=0  7  0 A2  6 6.5  6 - v=0  6  0 A1  5 5.5  5 : 1d-CF3I_3d-H3N_6bAr_Cu-FT-660000-high_res.txt - Overlays     :  12:<LineList>
    7 A2  18     6 A1  19    16144.7620    16144.7830       -0.0210 1.00000 3.0e-7 0.0000 : qR0(6)8,7.5,7,7,6.5,6 : v=0  7  0 A2  8 7.5  7 - v=0  6  0 A1  7 6.5  6 : 1d-CF3I_3d-H3N_6bAr_Cu-FT-660000-high_res.txt - Overlays     :  13:<LineList>
    5 A2  27     4 A1  26    16144.7620    16144.7807       -0.0187 1.00000 2.2e-7 0.0000 : qR0(6)6,5.5,5,5,4.5,4 : v=0  7  0 A2  6 5.5  5 - v=0  6  0 A1  5 4.5  4 : 1d-CF3I_3d-H3N_6bAr_Cu-FT-660000-high_res.txt - Overlays     :  14:<LineList>
    8 A2  13     7 A1  15    16144.7620    16144.7766       -0.0146 1.00000 3.5e-7 0.0000 : qR0(6)8,8.5,8,7,7.5,7 : v=0  7  0 A2  8 8.5  8 - v=0  6  0 A1  7 7.5  7 : 1d-CF3I_3d-H3N_6bAr_Cu-FT-660000-high_res.txt - Overlays     :  15:<LineList>
   10 A2   5     9 A1   5    16149.8960    16149.8766        0.0194 1.00000 4.9e-7 0.0000 : qR0(6)6,7.5,10,5,6.5,9 : v=0  7  0 A2  6 7.5 10 - v=0  6  0 A1  5 6.5  9 : 1d-CF3I_3d-H3N_6bAr_Cu-FT-660000-high_res.txt - Overlays    :  16:<LineList>
   11 A2   2    10 A1   2    16149.8960    16149.8667        0.0293 1.00000 5.4e-7 0.0000 : qR0(6)7,8.5,11,6,7.5,10 : v=0  7  0 A2  7 8.5 11 - v=0  6  0 A1  6 7.5 10 : 1d-CF3I_3d-H3N_6bAr_Cu-FT-660000-high_res.txt - Overlays   :  17:<LineList>
   12 A2   1    11 A1   1    16149.8960    16149.8818        0.0142 1.00000 5.9e-7 0.0000 : qR0(6)8,9.5,12,7,8.5,11 : v=0  7  0 A2  8 9.5 12 - v=0  6  0 A1  7 8.5 11 : 1d-CF3I_3d-H3N_6bAr_Cu-FT-660000-high_res.txt - Overlays   :  18:<LineList>
    7 A2  23     6 A1  23    16150.0410    16150.0467       -0.0057 1.00000 3.4e-7 0.0000 : qR0(6)6,4.5,7,5,3.5,6 : v=0  7  0 A2  6 4.5  7 - v=0  6  0 A1  5 3.5  6 : 1d-CF3I_3d-H3N_6bAr_Cu-FT-660000-high_res.txt - Overlays     :  19:<LineList>
    9 A2  10     8 A1  10    16150.0410    16150.0575       -0.0165 1.00000 4.4e-7 0.0000 : qR0(6)8,6.5,9,7,5.5,8 : v=0  7  0 A2  8 6.5  9 - v=0  6  0 A1  7 5.5  8 : 1d-CF3I_3d-H3N_6bAr_Cu-FT-660000-high_res.txt - Overlays     :  20:<LineList>
   11 A2   3    10 A1   3    16150.0410    16150.0472       -0.0062 1.00000 5.3e-7 0.0000 : qR0(6)8,8.5,11,7,7.5,10 : v=0  7  0 A2  8 8.5 11 - v=0  6  0 A1  7 7.5 10 : 1d-CF3I_3d-H3N_6bAr_Cu-FT-660000-high_res.txt - Overlays   :  21:<LineList>
    9 A2  11     8 A1  11    16150.2620    16150.2504        0.0116 1.00000 4.3e-7 0.0000 : qR0(6)7,6.5,9,6,5.5,8 : v=0  7  0 A2  7 6.5  9 - v=0  6  0 A1  6 5.5  8 : 1d-CF3I_3d-H3N_6bAr_Cu-FT-660000-high_res.txt - Overlays     :  22:<LineList>
    8 A2  18     7 A1  18    16150.2620    16150.2648       -0.0028 1.00000 3.8e-7 0.0000 : qR0(6)6,5.5,8,5,4.5,7 : v=0  7  0 A2  6 5.5  8 - v=0  6  0 A1  5 4.5  7 : 1d-CF3I_3d-H3N_6bAr_Cu-FT-660000-high_res.txt - Overlays     :  23:<LineList>
   10 A2   6     9 A1   6    16150.2620    16150.2722       -0.0102 1.00000 4.8e-7 0.0000 : qR0(6)8,7.5,10,7,6.5,9 : v=0  7  0 A2  8 7.5 10 - v=0  6  0 A1  7 6.5  9 : 1d-CF3I_3d-H3N_6bAr_Cu-FT-660000-high_res.txt - Overlays    :  24:<LineList>
    7 A2  20     6 A1  18    16151.4110    16151.4406       -0.0296 1.00000 2.9e-7 0.0000 : qR0(6)6,5.5,7,5,4.5,6 : v=0  7  0 A2  6 5.5  7 - v=0  6  0 A1  5 4.5  6 : 1d-CF3I_3d-H3N_6bAr_Cu-FT-660000-high_res.txt - Overlays     :  25:<LineList>
    9 A2   8     8 A1   8    16151.4110    16151.4393       -0.0283 1.00000 3.8e-7 0.0000 : qR0(6)8,7.5,9,7,6.5,8 : v=0  7  0 A2  8 7.5  9 - v=0  6  0 A1  7 6.5  8 : 1d-CF3I_3d-H3N_6bAr_Cu-FT-660000-high_res.txt - Overlays     :  26:<LineList>
   10 A2   4     9 A1   4    16151.6240    16151.6219        0.0021 1.00000 4.6e-7 0.0000 : qR0(6)8,8.5,10,7,7.5,9 : v=0  7  0 A2  8 8.5 10 - v=0  6  0 A1  7 7.5  9 : 1d-CF3I_3d-H3N_6bAr_Cu-FT-660000-high_res.txt - Overlays    :  27:<LineList>
    8 A2  15     7 A1  14    16151.6240    16151.6220        0.0020 1.00000 3.7e-7 0.0000 : qR0(6)6,6.5,8,5,5.5,7 : v=0  7  0 A2  6 6.5  8 - v=0  6  0 A1  5 5.5  7 : 1d-CF3I_3d-H3N_6bAr_Cu-FT-660000-high_res.txt - Overlays     :  28:<LineList>
    8 E   32     7 E   32    18454.9710    18454.9662        0.0048 1.00000 2.9e-7 0.0000 : qR1(7)8,7.5,8,7,6.5,7 : v=0  8  1 E  8 7.5  8 - v=0  7  1 E  7 6.5  7 : 1d-CF3I_3d-H3N_6bAr_Cu-FT-660000-high_res.txt - Overlays       :  29:<LineList>
    9 A1   8     8 A2   8    18454.9710    18454.9609        0.0101 1.00000 4.7e-7 0.0000 : qR0(7)7,8.5,9,6,7.5,8 : v=0  8  0 A1  7 8.5  9 - v=0  7  0 A2  6 7.5  8 : 1d-CF3I_3d-H3N_6bAr_Cu-FT-660000-high_res.txt - Overlays     :  30:<LineList>
   11 A1   2    10 A2   2    18454.9710    18454.9644        0.0066 1.00000 5.7e-7 0.0000 : qR0(7)9,10.5,11,8,9.5,10 : v=0  8  0 A1  9 10.5 11 - v=0  7  0 A2  8 9.5 10 : 1d-CF3I_3d-H3N_6bAr_Cu-FT-660000-high_res.txt - Overlays :  31:<LineList>
   10 A1   4     9 A2   4    18454.9710    18454.9299        0.0411 1.00000 5.2e-7 0.0000 : qR0(7)8,9.5,10,7,8.5,9 : v=0  8  0 A1  8 9.5 10 - v=0  7  0 A2  7 8.5  9 : 1d-CF3I_3d-H3N_6bAr_Cu-FT-660000-high_res.txt - Overlays    :  32:<LineList>
   11 A1   5    10 A2   5    18456.3650    18456.3653       -0.0003 1.00000 6.0e-7 0.0000 : qR0(7)7,8.5,11,6,7.5,10 : v=0  8  0 A1  7 8.5 11 - v=0  7  0 A2  6 7.5 10 : 1d-CF3I_3d-H3N_6bAr_Cu-FT-660000-high_res.txt - Overlays   :  33:<LineList>
    8 E   35     7 E   34    18456.3650    18456.3899       -0.0249 1.00000 3.1e-7 0.0000 : qR1(7)8,6.5,8,7,5.5,7 : v=0  8  1 E  8 6.5  8 - v=0  7  1 E  7 5.5  7 : 1d-CF3I_3d-H3N_6bAr_Cu-FT-660000-high_res.txt - Overlays       :  34:<LineList>
   13 A1   1    12 A2   1    18456.3650    18456.3699       -0.0049 1.00000 7.1e-7 0.0000 : qR0(7)9,10.5,13,8,9.5,12 : v=0  8  0 A1  9 10.5 13 - v=0  7  0 A2  8 9.5 12 : 1d-CF3I_3d-H3N_6bAr_Cu-FT-660000-high_res.txt - Overlays :  35:<LineList>
   12 A1   2    11 A2   2    18456.3650    18456.3585        0.0065 1.00000 6.5e-7 0.0000 : qR0(7)8,9.5,12,7,8.5,11 : v=0  8  0 A1  8 9.5 12 - v=0  7  0 A2  7 8.5 11 : 1d-CF3I_3d-H3N_6bAr_Cu-FT-660000-high_res.txt - Overlays   :  36:<LineList>

SVD fit: 35 Observations,  6 Parameters (scaled)
Initial Average Error: 0.0203584942735456
Predicted New Error:   0.0203584942722022
Parameters:
  # Old                 New                 Std Dev   Change/Std Sens    Summary              Name
  1 1153.45325515486    1153.45325509509    .00189147    0.0000  2.41e-5 1153.4533(19)        v=0 B
  2 9.74123370533582e-5 9.74117527279653e-5 1.7345e-5    0.0000  2.31e-7 9.7(17)e-5           v=0 DJ
  3 .00972659395230637  .00972658678509104  .00080349    0.0000  7.10e-5 9.73(80)e-3          v=0 DJK
  4 -2.17694214445442   -2.17693000245709   .41441403    0.0000  .031595 -2.18(41)            N eQq
  5 58.6964681690804    58.6964718525439    .43734518    0.0000  .034915 58.70(44)            Cu eQq
  6 -613.624620146750   -613.624601000428   .76874885    0.0000  .058892 -613.62(77)          I eQq

Correlation Matrix
Determinant = 0.007, Largest off-diagonal element = 0.988 at 2,1 = v=0 DJ, v=0 B
       1       2       3       4       5       6
  1   1.000
  2   0.988   1.000
  3   0.097   0.033   1.000
  4   0.462   0.414   0.250   1.000
  5  -0.342  -0.311  -0.190  -0.247   1.000
  6  -0.285  -0.298   0.140   0.194  -0.327   1.000
